# Supplementary material for: THE PROBLEM OF CHEMICAL BONDS IN XENON TETRAFLUORIDE
Source: Royal Society of Chemistry journal article supplement (doi:10.1039/c6ob02479c), 1963-06-01

The ESI for *Org. Biomol. Chem.*, 2017, **15**, 1913-1920, DOI: 10.1039/C6OB02479C, originally published on 7th February 2017, was updated on 2nd August 2022.

## Direct access to the optically active VAcHT inhibitor vesamicol and its analogues *via* the asymmetric aminolysis of *meso*-epoxides with secondary aliphatic amines

Arun Sharma, Jyoti Agarwal, and Rama Krishna Peddinti\*

Department of Chemistry, Indian Institute of Technology Roorkee  
Roorkee-247 667, Uttarakhand, India

E-mail: [rkpeddinti@cy.iitr.ac.in](mailto:rkpeddinti@cy.iitr.ac.in), [ramakpeddinti@gmail.com](mailto:ramakpeddinti@gmail.com)

### Correction Notice for Revised ESI

The NMR spectra of **4a**, **4b**, **4c**, **4i**, **4j**, **4k** and **4p** provided earlier were those of racemic compounds. Now this oversight has been corrected by replacing them with NMR spectra of optically active compounds.

---

### ELECTRONIC SUPPLEMENTARY INFORMATION

---

|                                                                                                                 |         |
|-----------------------------------------------------------------------------------------------------------------|---------|
| NMR data of compounds <b>4a</b> , <b>4b</b> , <b>4c</b> , <b>4i</b> , <b>4j</b> , <b>4k</b> and <b>4p</b> ..... | S2      |
| Copies of <sup>1</sup> H and <sup>13</sup> C NMR spectra of compounds <b>4a–4p</b> .....                        | S3–S18  |
| HPLC Analysis data of compounds <b>4a–4p</b> .....                                                              | S19–S20 |
| Copies of HPLC chromatograms of compounds <b>4a–4p</b> .....                                                    | S21–S36 |
| CD-Spectra of selected compounds.....                                                                           | S37     |

## NMR data of compounds 4a, 4b, 4c, 4i, 4j, 4k and 4p

**(1*S*,2*S*)-2-(4-Phenylpiperidin-1-yl)cyclohexanol (4a).** <sup>1</sup>H NMR (500 MHz, CDCl<sub>3</sub>): δ 7.33–7.28 (m, 2H), 7.25–7.21 (m, 3H), 3.39 (dt, *J* = 4.5, 10.0 Hz, 1H), 2.94 (d, *J* = 11.0 Hz, 1H), 2.77–2.70 (m, 2H), 2.49 (tt, *J* = 4.0, 12.0 Hz, 1H), 2.28–2.20 (m, 2H), 2.18–2.10 (m, 1H), 1.91–1.76 (m, 5H), 1.74–1.61 (m, 2H), 1.30–1.15 (m, 4H) ppm. <sup>13</sup>C NMR (125 MHz, CDCl<sub>3</sub>) δ 146.2, 128.3, 126.7, 126.0, 70.6, 68.6, 53.4, 45.4, 42.9, 34.2, 33.9, 33.2, 25.5, 24.0, 22.2 ppm.

**(1*S*,2*S*)-2-(4-*p*-Tolylpiperidin-1-yl)cyclohexanol (4b).** <sup>1</sup>H NMR (500 MHz, CDCl<sub>3</sub>): δ 7.12 (s, 4H), 3.47–3.40 (m, 1H), 3.00 (d, *J* = 11.5 Hz, 1H), 2.87–2.71 (m, 2H), 2.47 (tt, *J* = 4.0, 12.0 Hz, 1H), 2.32 (s, 3H), 2.31–2.26 (m, 2H), 2.17–2.11 (m, 1H), 1.90–1.78 (m, 4H), 1.75–1.68 (m, 2H), 1.30–1.18 (m, 5H) ppm. <sup>13</sup>C NMR (100 MHz, CDCl<sub>3</sub>): δ 142.9, 135.7, 129.1, 126.6, 70.6, 68.7, 53.3, 45.6, 42.3, 33.9, 33.6, 33.4, 29.6, 25.5, 24.0, 22.4, 20.9 ppm.

**(1*S*,2*S*)-2-(4-(4-Methoxyphenyl)piperidin-1-yl)cyclohexanol (4c).** <sup>1</sup>H NMR (400 MHz, CDCl<sub>3</sub>): δ 7.14 (d, *J* = 8.5 Hz, 2H), 6.85 (d, *J* = 8.5 Hz, 2H), 3.79 (s, 3H), 3.45–3.36 (m, 1H), 2.94 (d, *J* = 10.0 Hz, 1H), 2.81–2.70 (m, 2H), 2.49–2.40 (m, 1H), 2.30–2.20 (m, 2H), 2.18–2.10 (m, 1H), 1.89–1.76 (m, 6H), 1.75–1.50 (m, 2H), 1.32–1.15 (m, 3H) ppm. <sup>13</sup>C NMR (100 MHz, CDCl<sub>3</sub>): δ 157.9, 138.4, 127.6, 113.7, 70.6, 68.6, 55.2, 53.4, 45.4, 42.0, 34.5, 34.1, 33.2, 25.6, 24.1, 22.2 ppm.

**(2*S*,3*S*)-3-(4-Phenylpiperidin-1-yl)-1,2,3,4-tetrahydronaphthalen-2-ol (4i).** <sup>1</sup>H NMR (500 MHz, CDCl<sub>3</sub>): δ 7.35–7.31 (m, 2H), 7.27–7.19 (m, 3H), 7.16–7.08 (m, 4H), 4.38 (s, 1H, –OH), 3.90 (dt, *J* = 6.0, 10.0 Hz, 1H), 3.33 (dd, *J* = 6.0, 16.0 Hz, 1H), 3.12–2.78 (m, 7H), 2.56 (tt, *J* = 3.5, 12.0 Hz, 1H), 2.39 (dt, *J* = 2.0, 11.5 Hz, 1H), 1.97–1.81 (m, 3H), 1.75 (ddd, *J* = 4.0, 12.5, 25.0 Hz, 1H) ppm. <sup>13</sup>C NMR (125 MHz, CDCl<sub>3</sub>) δ 146.0, 134.8, 134.0, 129.2, 129.1, 128.4, 126.8, 126.2, 126.1, 125.9, 66.5, 65.6, 53.6, 45.0, 42.9, 37.8, 34.3, 33.8, 26.0 ppm.

**(2*S*,3*S*)-3-(4-*p*-Tolylpiperidin-1-yl)-1,2,3,4-tetrahydronaphthalen-2-ol (4j).** <sup>1</sup>H NMR (500 MHz, CDCl<sub>3</sub>): δ 7.18–7.08 (m, 8H), 3.93 (dt, *J* = 6.0, 10.0 Hz, 1H), 3.33 (dd, *J* = 6.0, 16.0 Hz, 1H), 3.08–2.78 (m, 7H), 2.55 (tt, *J* = 8.0, 12.0 Hz, 1H), 2.43 (dt, *J* = 2.5, 11.5 Hz, 1H), 2.35 (s, 3H), 1.99–1.78 (m, 3H), 1.83–1.72 (m, 1H) ppm. <sup>13</sup>C NMR (125 MHz, CDCl<sub>3</sub>): δ 143.0, 135.7, 134.8, 134.0, 129.2, 129.1, 126.6, 126.1, 126.0, 66.5, 65.7, 53.6, 45.0, 42.4, 37.8, 34.3, 33.9, 26.0, 20.9 ppm.

**(2*S*,3*S*)-3-(4-(4-Methoxyphenyl)piperidin-1-yl)-1,2,3,4-tetrahydronaphthalen-2-ol (4k).** <sup>1</sup>H NMR (500 MHz, CDCl<sub>3</sub>): δ 7.17–7.08 (m, 6H), 6.87 (d, *J* = 8.5 Hz, 2H), 3.89 (tt, *J* = 6.0, 10.0 Hz, 1H), 3.80 (s, 3H), 3.32 (dd, *J* = 6.0, 16.0 Hz, 1H), 3.12–2.78 (m, 7H), 2.51 (tt, *J* = 3.5, 12.0 Hz, 1H), 2.38 (t, *J* = 11.0 Hz, 1H), 1.97–1.76 (m, 3H), 1.80–1.60 (m, 1H) ppm. <sup>13</sup>C NMR (125 MHz, CDCl<sub>3</sub>): δ 157.9, 138.2, 134.8, 133.9, 129.2, 129.1, 127.6, 126.1, 125.9, 113.8, 66.5, 65.6, 55.2, 53.6, 45.0, 42.0, 37.8, 34.5, 34.0, 26.0 ppm.

**(1*S*,2*S*)-2-(Spiro[1-*H*-indene-1,4-piperidin-1-yl])cyclohexanol (4p).** <sup>1</sup>H NMR (500 MHz, CDCl<sub>3</sub>): δ 7.38 (d, *J* = 7.0 Hz, 1H), 7.31 (d, *J* = 7.0 Hz, 1H), 7.25 (m, 2H), 6.82 (d, *J* = 6.0 Hz, 1H), 6.74 (d, *J* = 6.0 Hz, 1H), 3.48–3.41 (m, 1H), 3.00–2.92 (m, 2H), 2.79–2.72 (m, 1H), 2.50 (dt, *J* = 2.0, 12.0 Hz, 1H), 2.36–2.27 (m, 1H), 2.24–2.13 (m, 2H), 2.06 (dt, *J* = 4.0, 13.0 Hz, 1H), 1.98–1.90 (m, 1H), 1.86–1.79 (m, 1H), 1.76–1.71 (m, 1H), 1.43–1.36 (m, 2H), 1.33–1.21 (m, 4H) ppm.

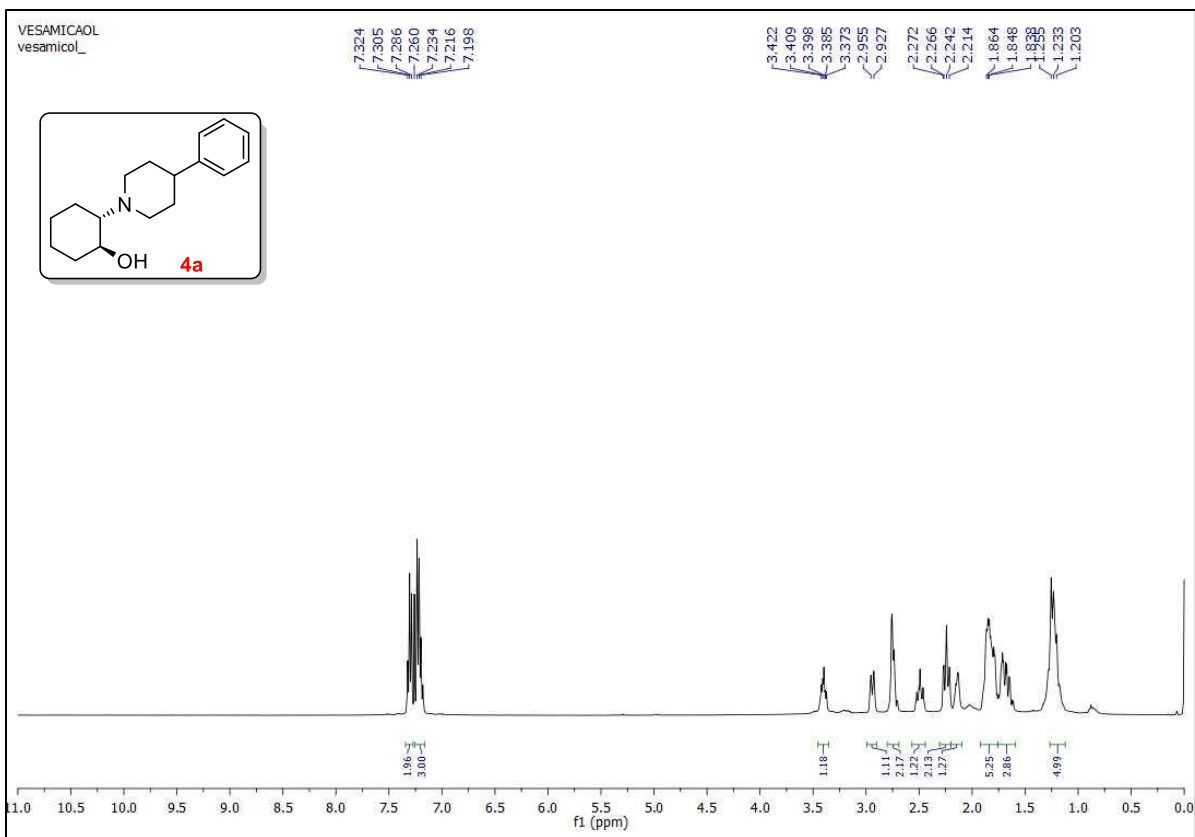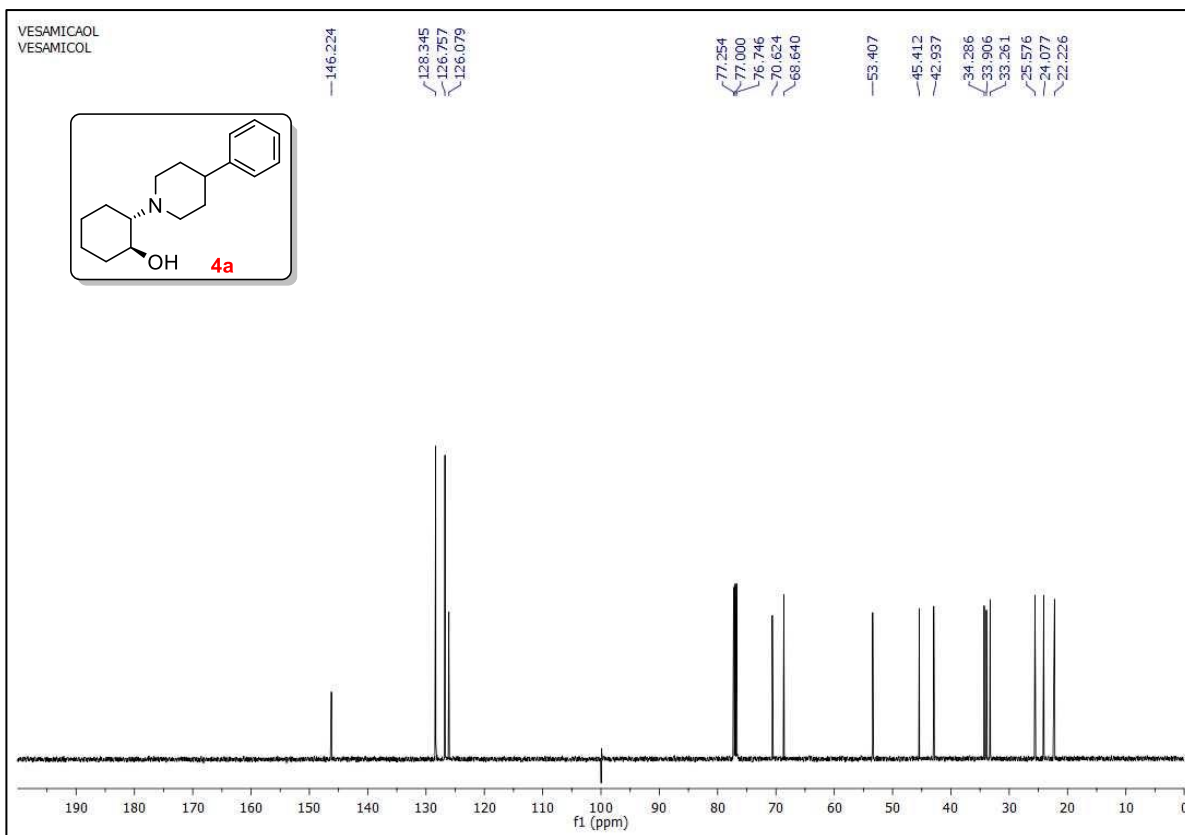

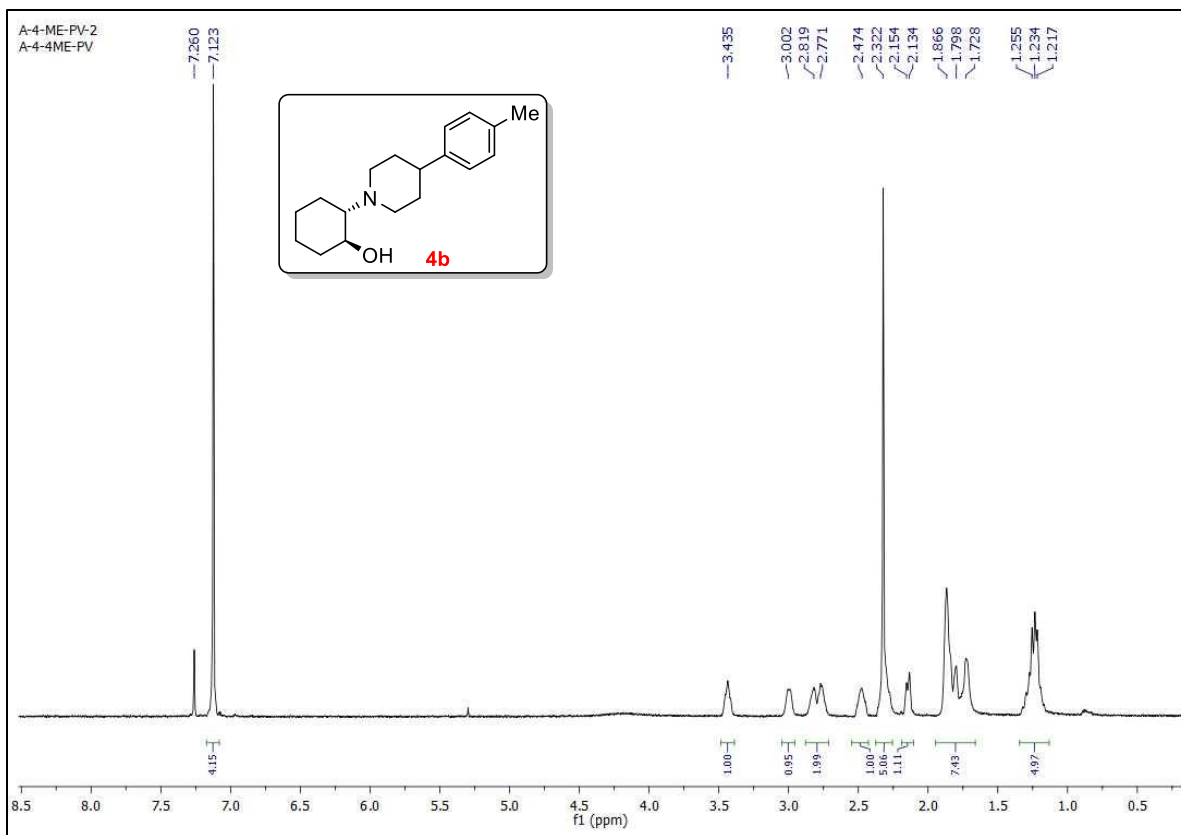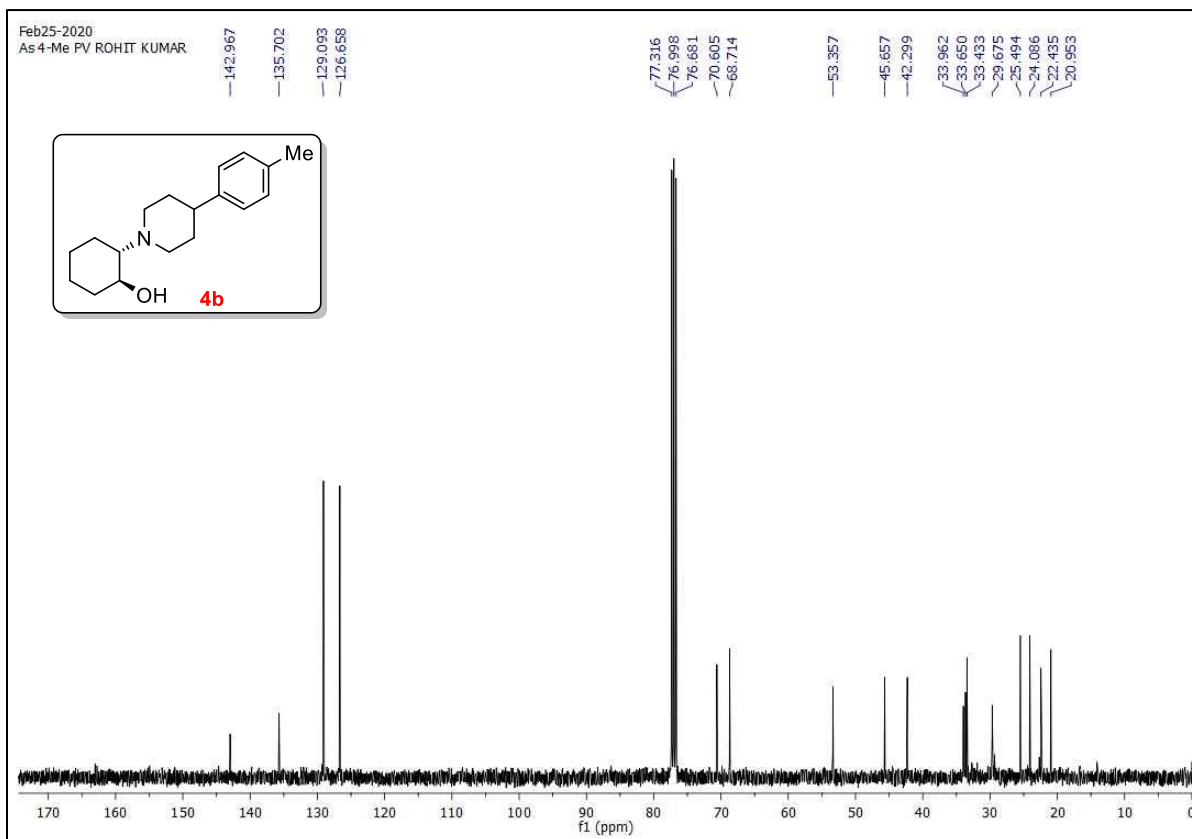

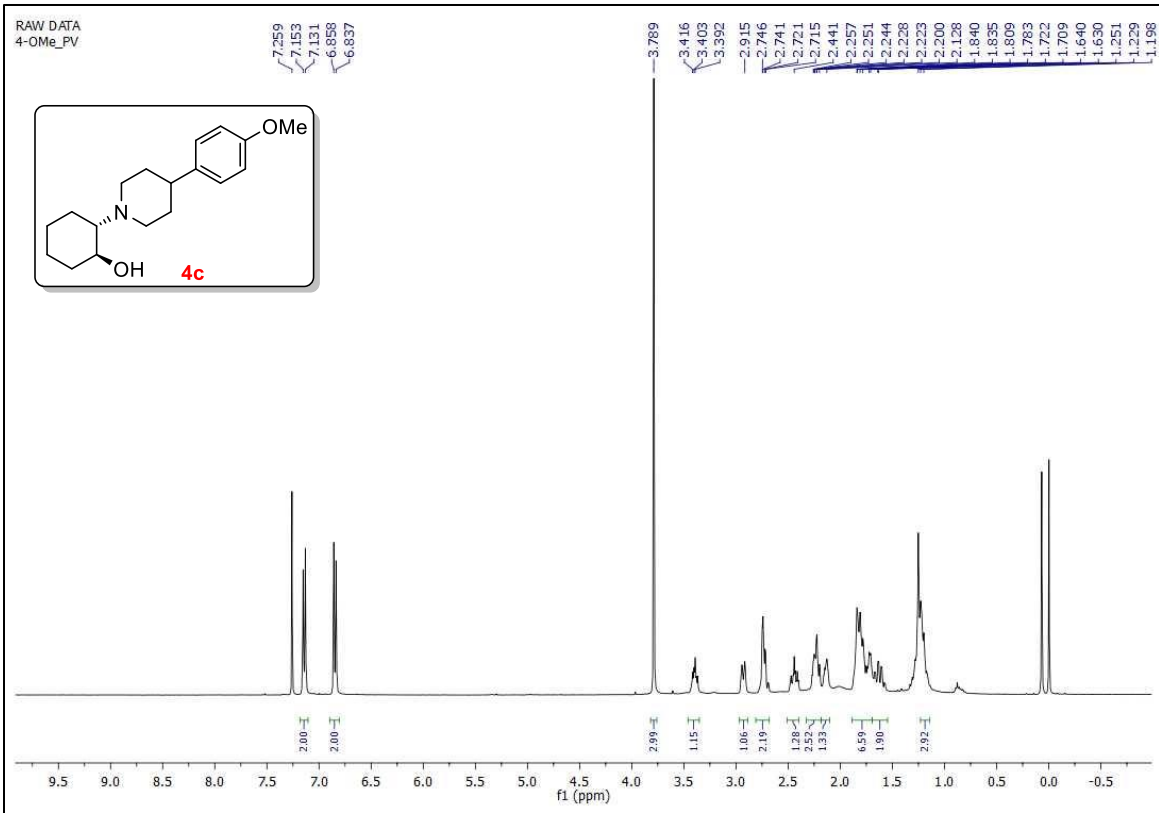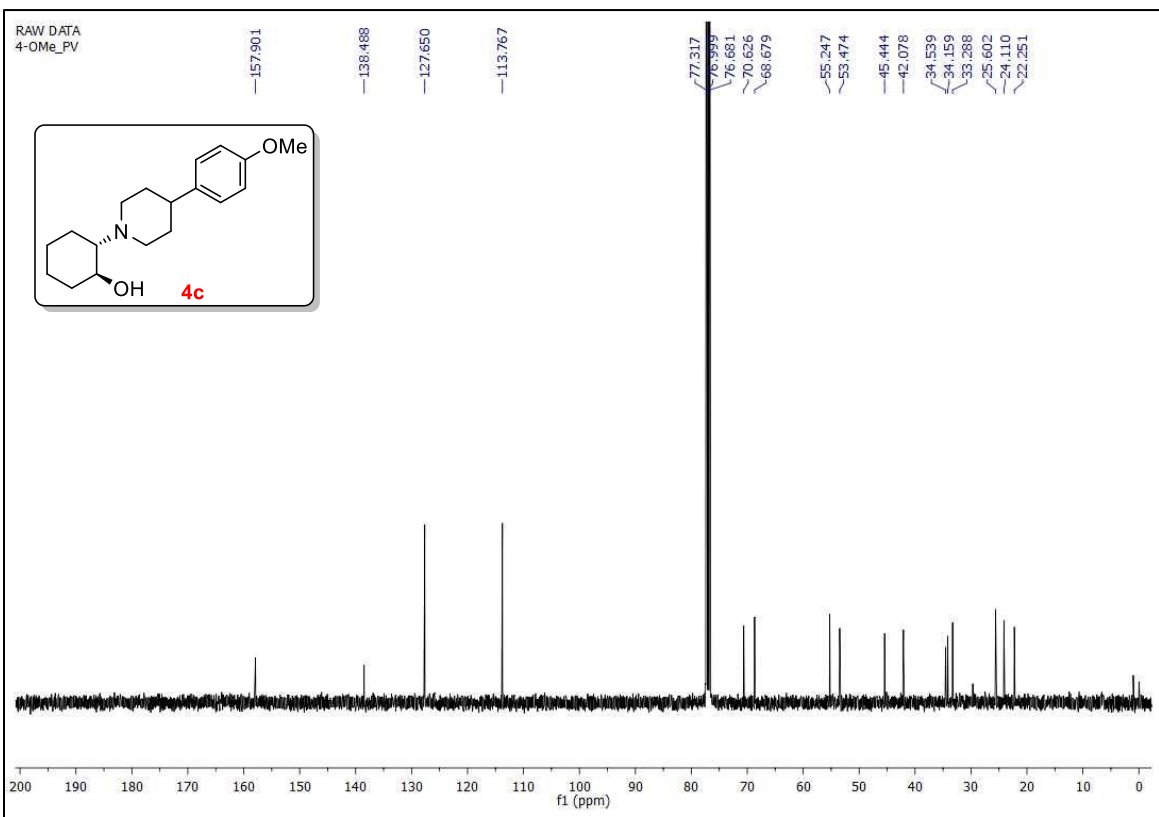

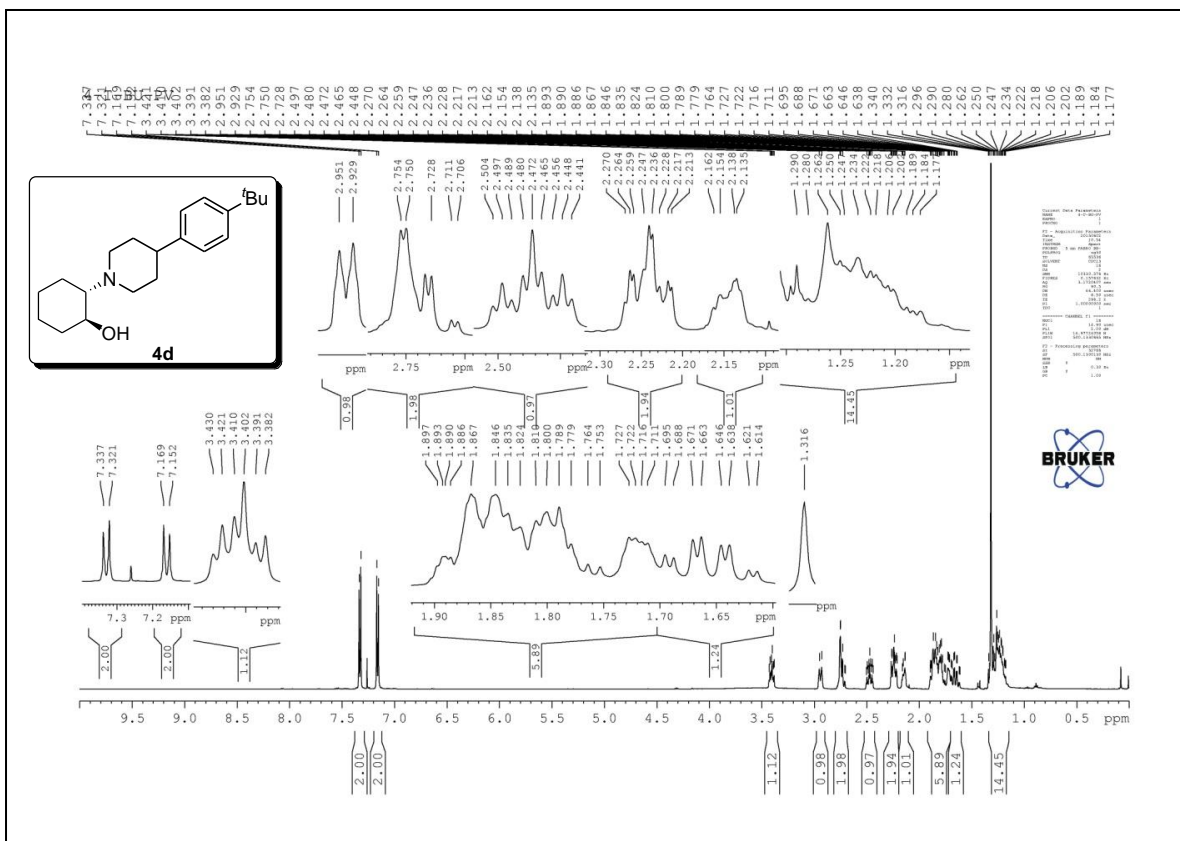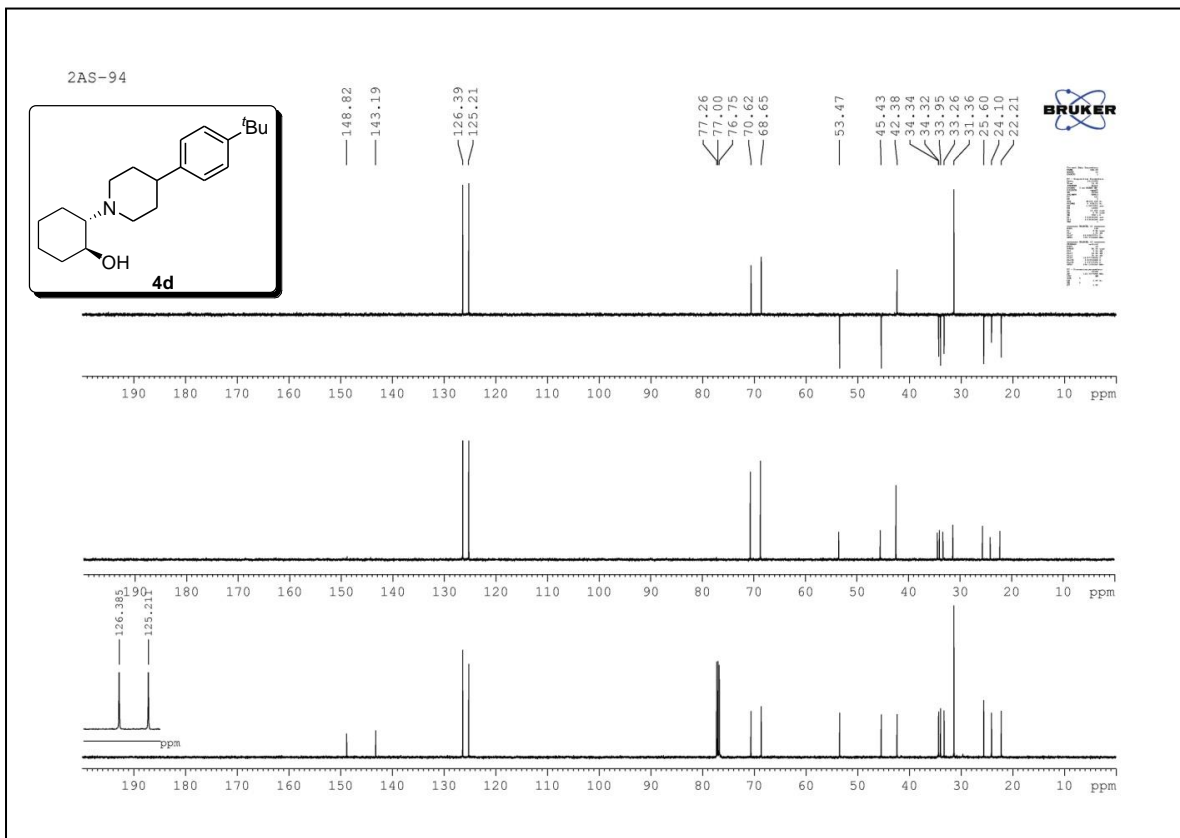

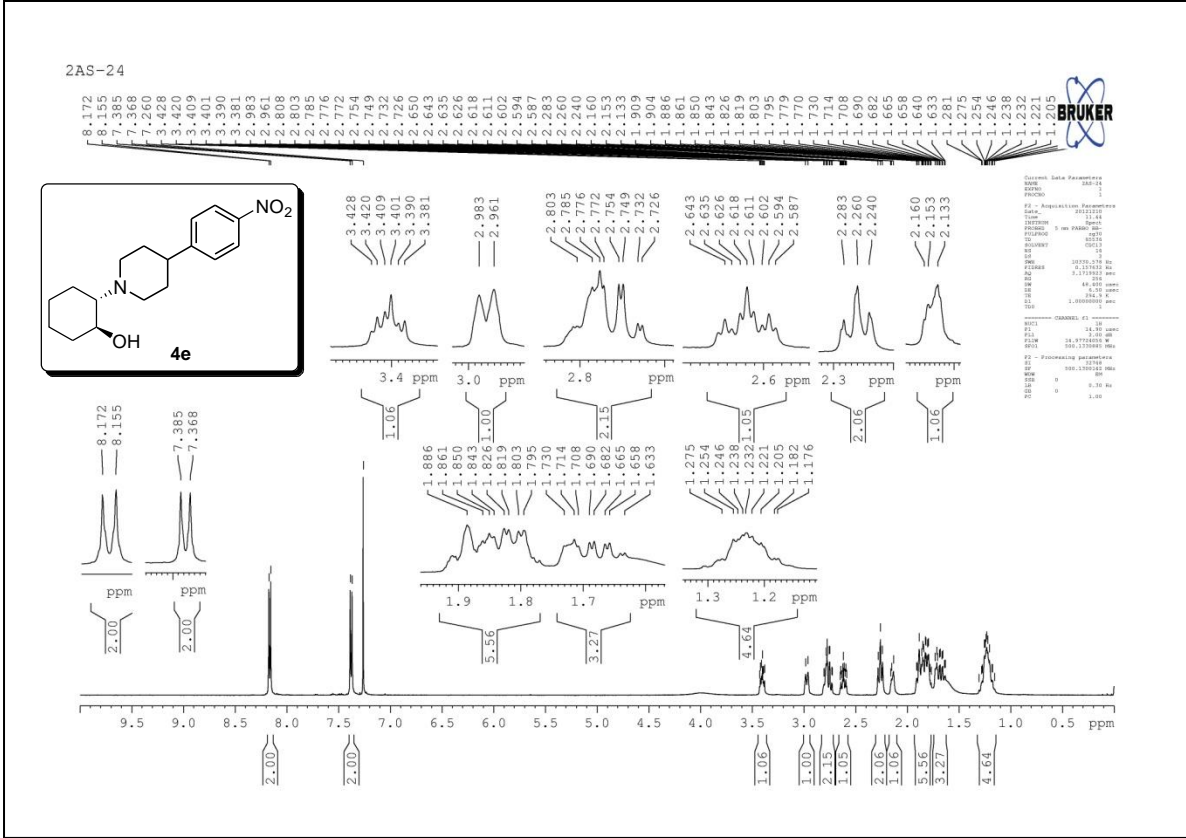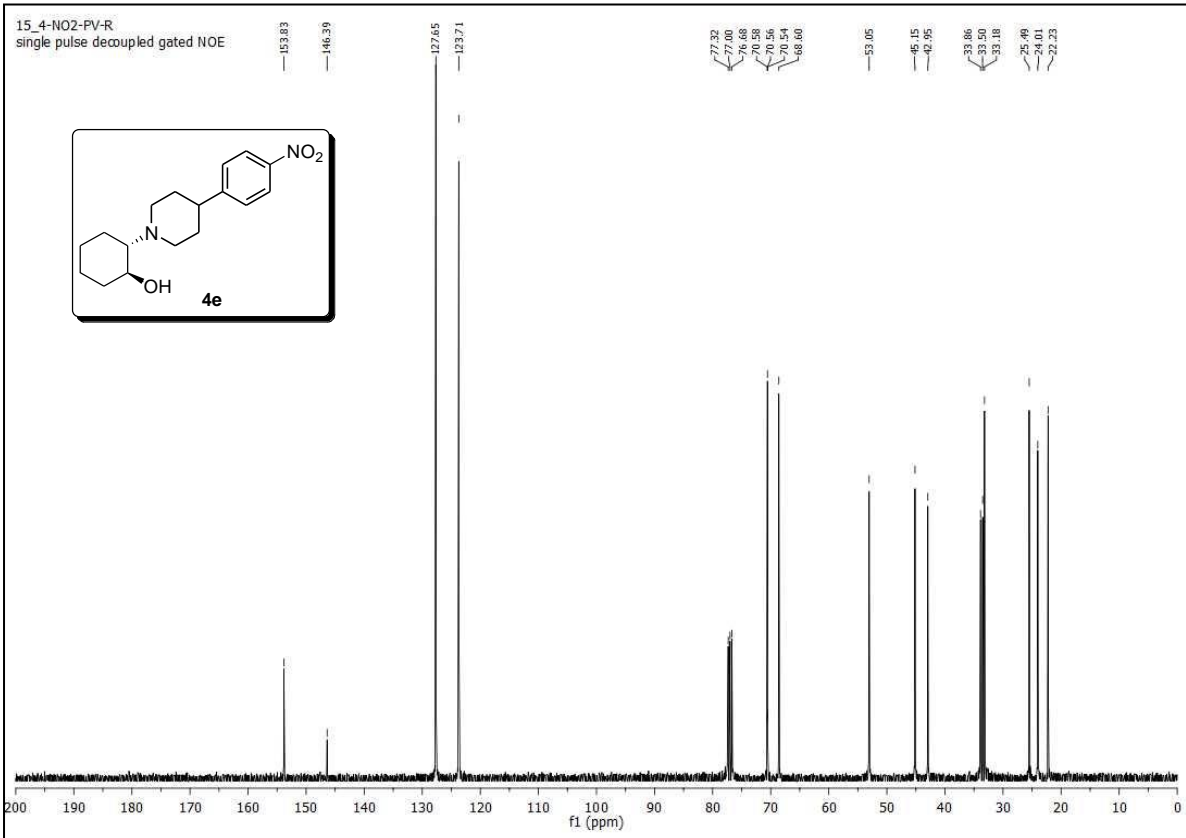

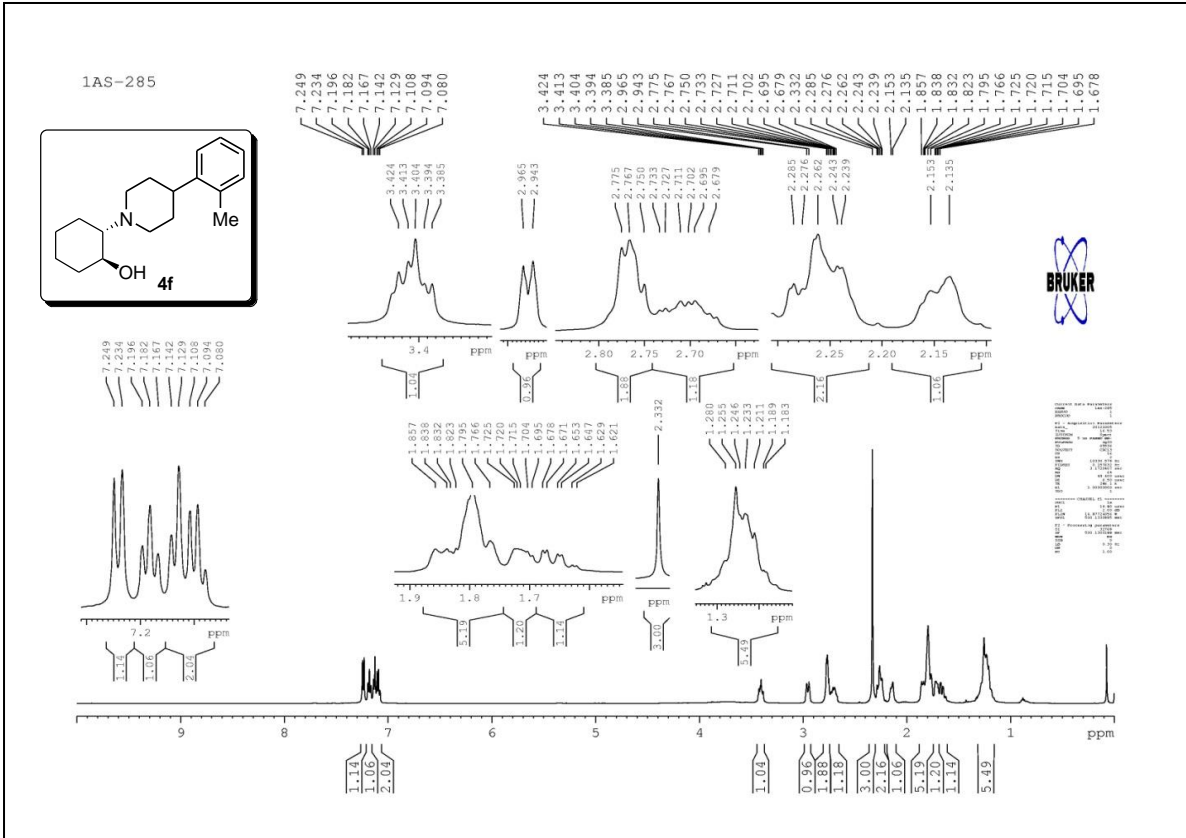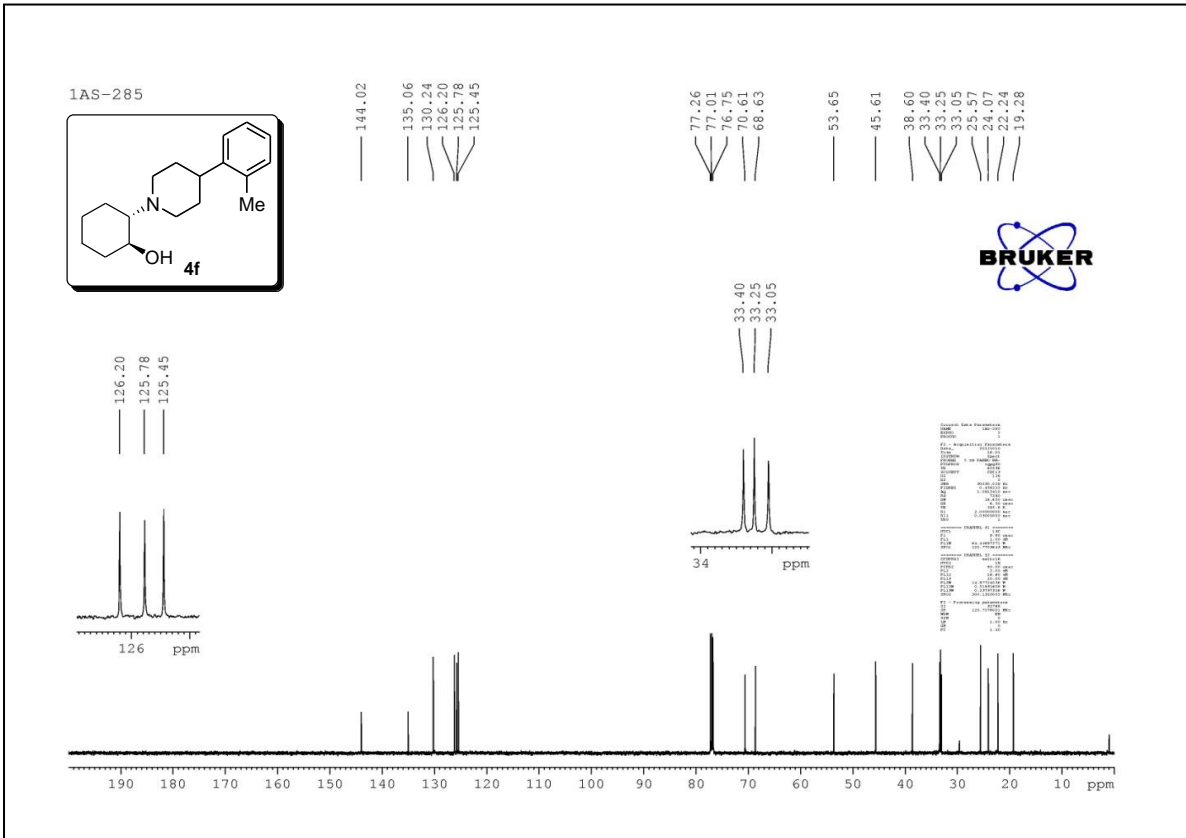



1AS-253

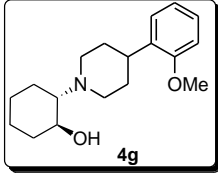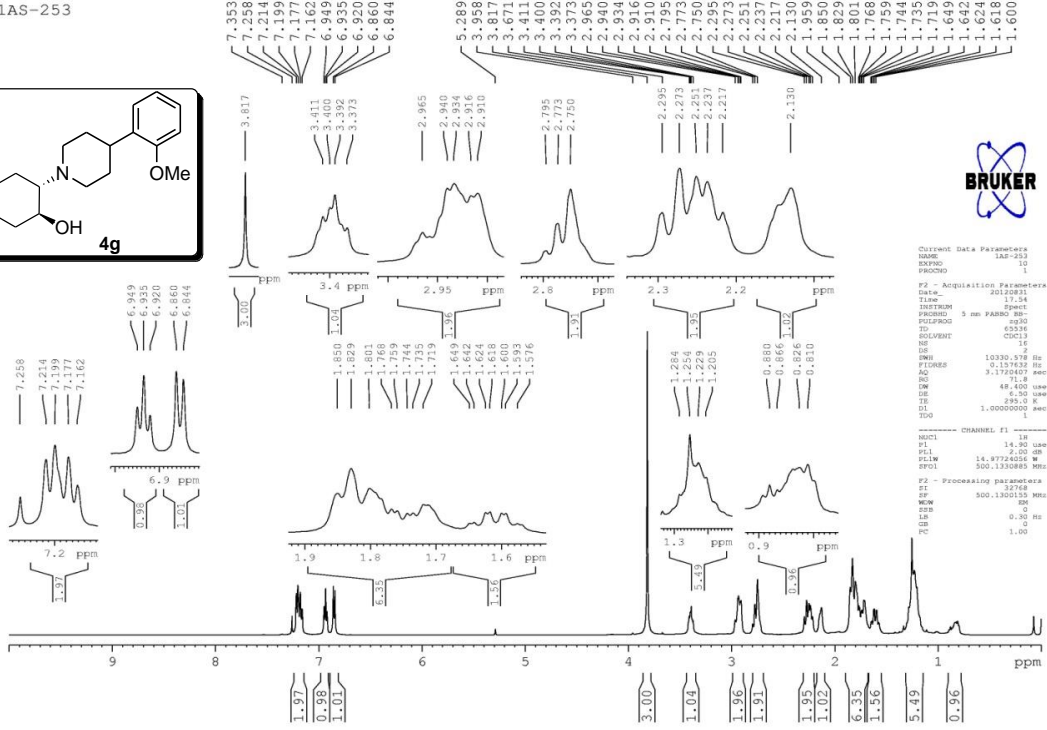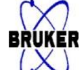

Customer Data Parameters  
 NAME: 1AS-253  
 EXPNO: 12  
 PROCNO: 1  
 F2 - Acquisition Parameters  
 Date\_: 20120821  
 Time: 13.54  
 INSTRUM: spect  
 PROBRW: 5 mm PABP-2002  
 PULPROG: zgpg30  
 TO: 0.0000000  
 SOLVENT: CDCl3  
 NS: 15  
 DS: 15  
 SWH: 10330.578 Hz  
 FIDRES: 0.157432 Hz  
 AQ: 3.1765017 sec  
 RG: 31.8  
 LB: 48.400 Hz  
 GB: 0.0000000 Hz  
 TE: 295.0 K  
 DQ: 1.0000000 sec  
 TD0: 1

----- CHANNEL f1 -----  
 NUC1: 1H  
 P1: 14.90 usec  
 PL1W: 2.000 dB  
 PL2: 14.9724000 MHz  
 RFQ1: 500.1350885 MHz  
 P2 - Processing parameters  
 SI: 32768  
 SF: 500.1350155 MHz  
 DSF: 0.0000000  
 SFO: 0.0000000  
 GB: 0.0000000 Hz  
 RB: 1.00

2AS-181.

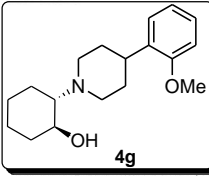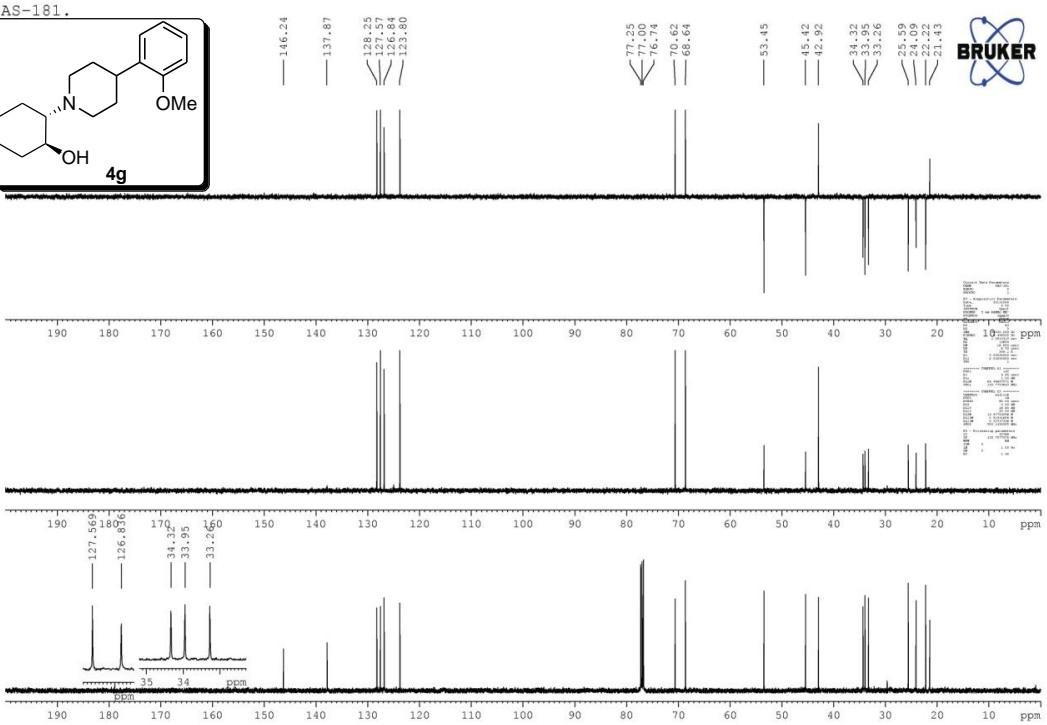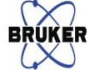

Customer Data Parameters  
 NAME: 2AS-181  
 EXPNO: 12  
 PROCNO: 1  
 F2 - Acquisition Parameters  
 Date\_: 20120821  
 Time: 13.54  
 INSTRUM: spect  
 PROBRW: 5 mm PABP-2002  
 PULPROG: zgpg30  
 TO: 0.0000000  
 SOLVENT: CDCl3  
 NS: 15  
 DS: 15  
 SWH: 10330.578 Hz  
 FIDRES: 0.157432 Hz  
 AQ: 3.1765017 sec  
 RG: 31.8  
 LB: 48.400 Hz  
 GB: 0.0000000 Hz  
 TE: 295.0 K  
 DQ: 1.0000000 sec  
 TD0: 1

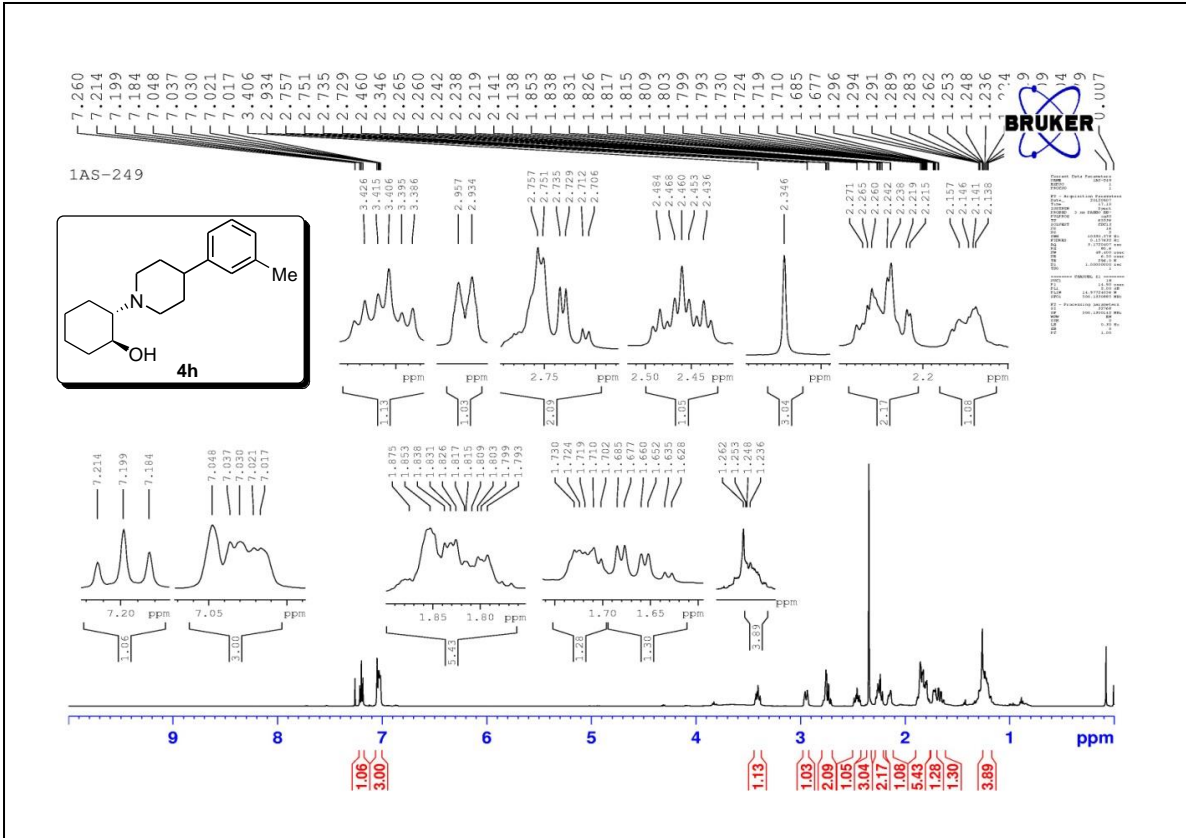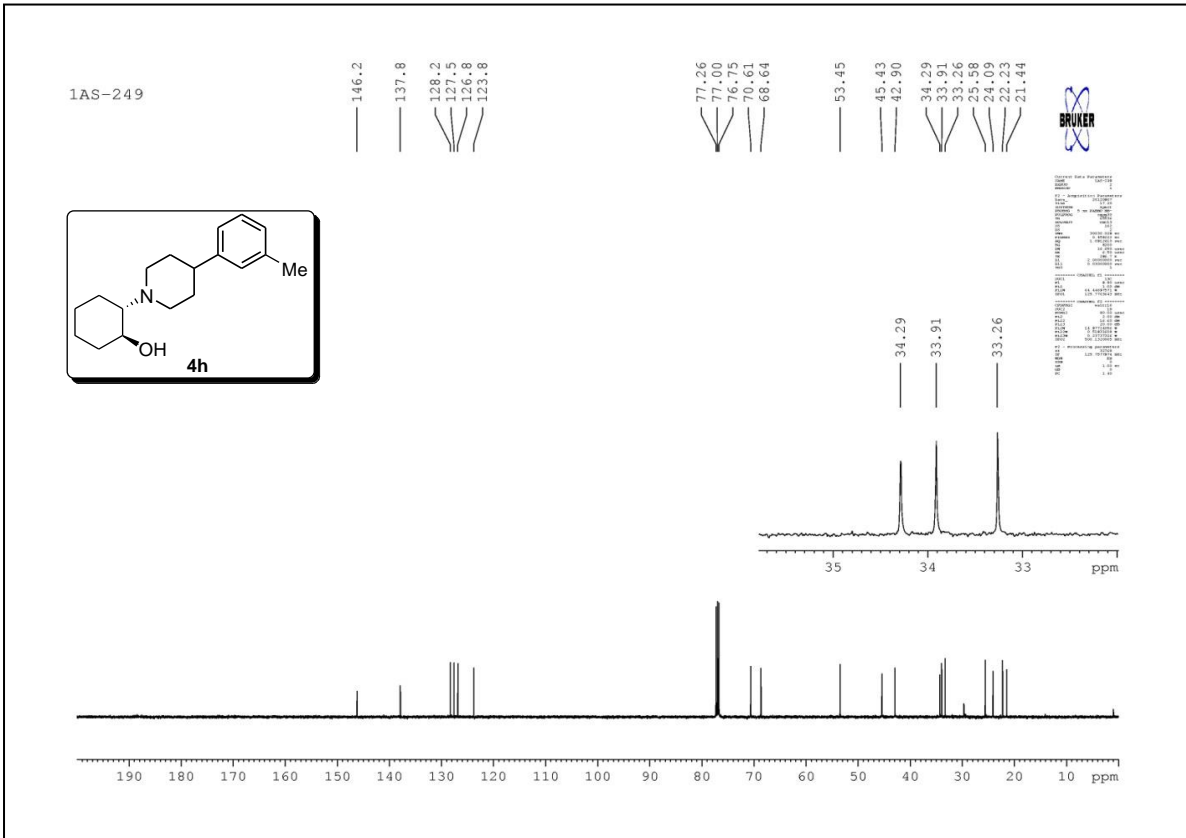

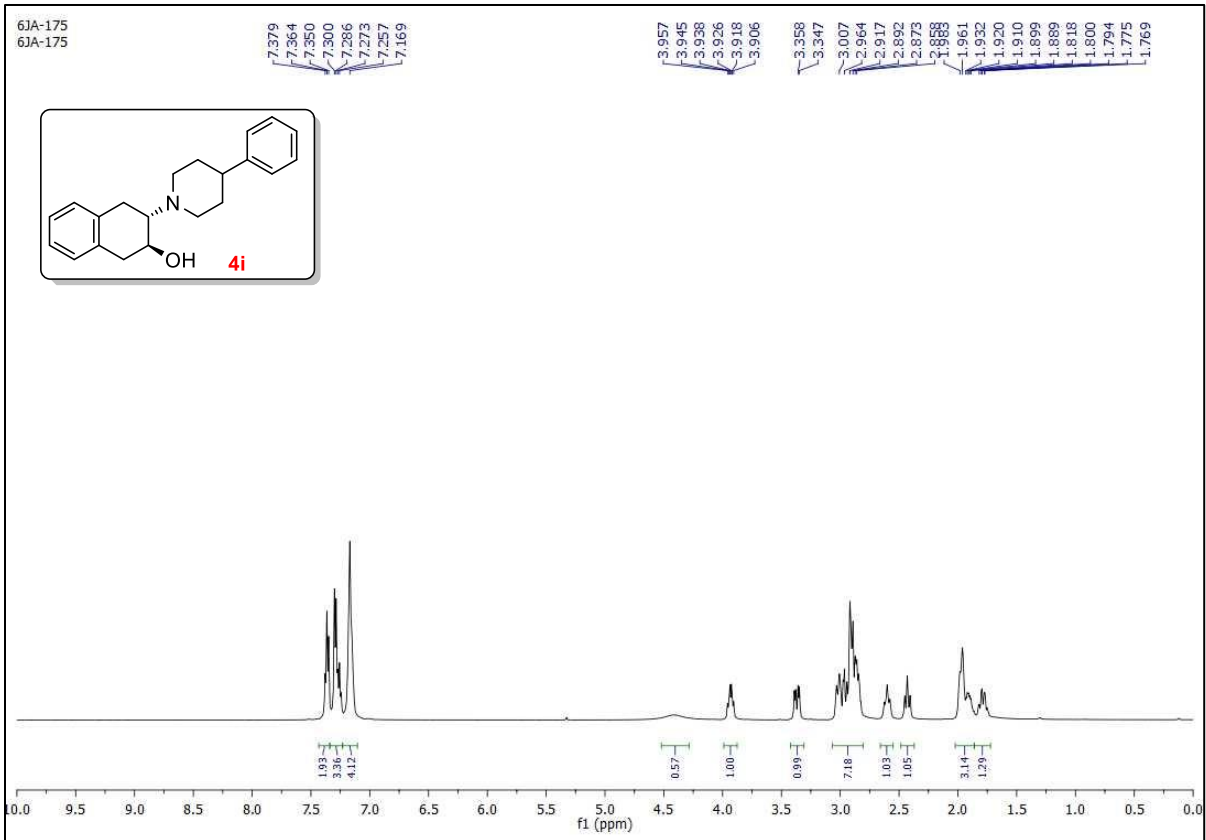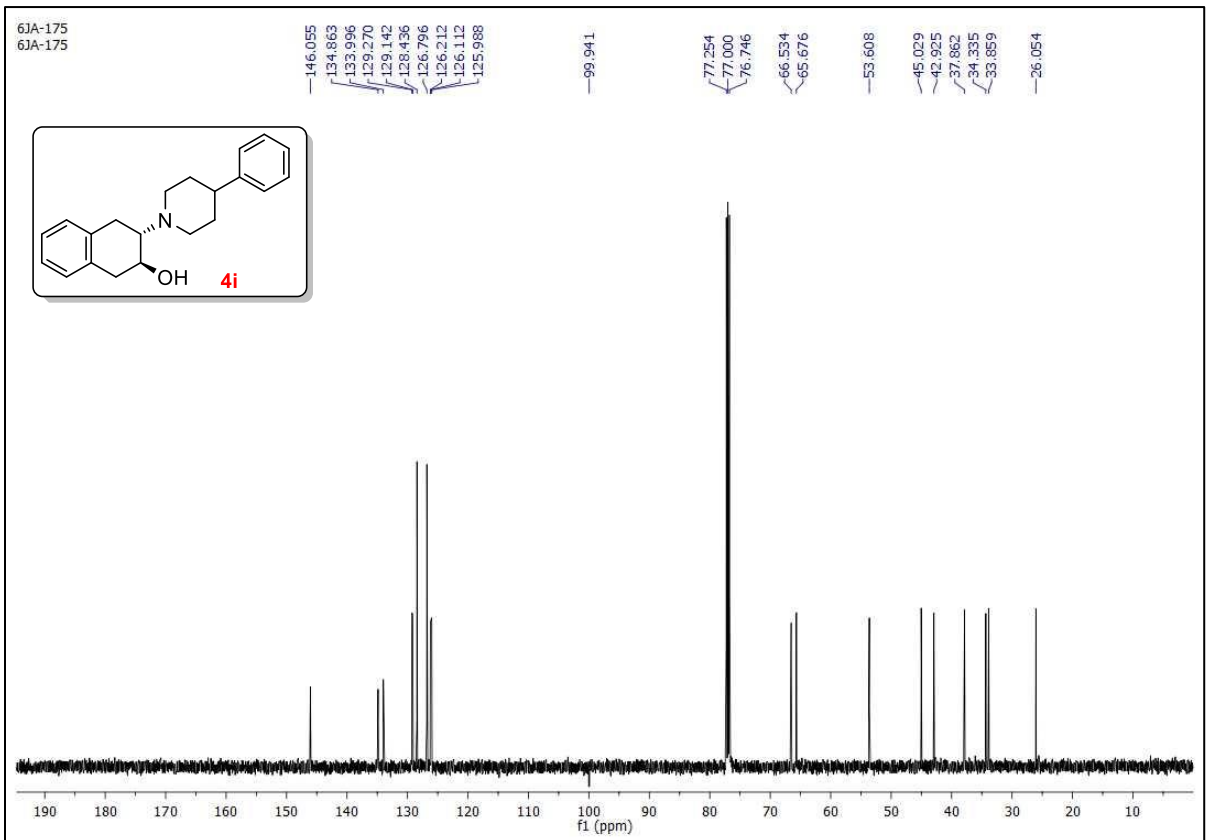

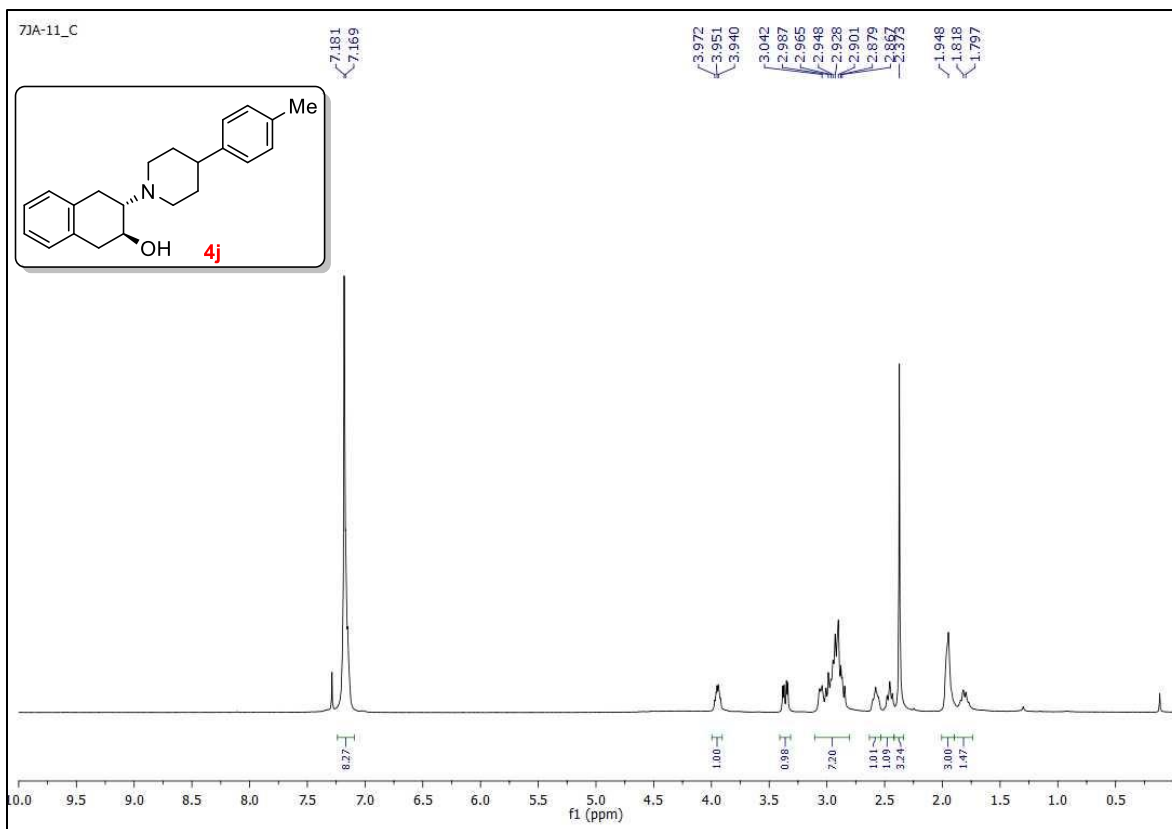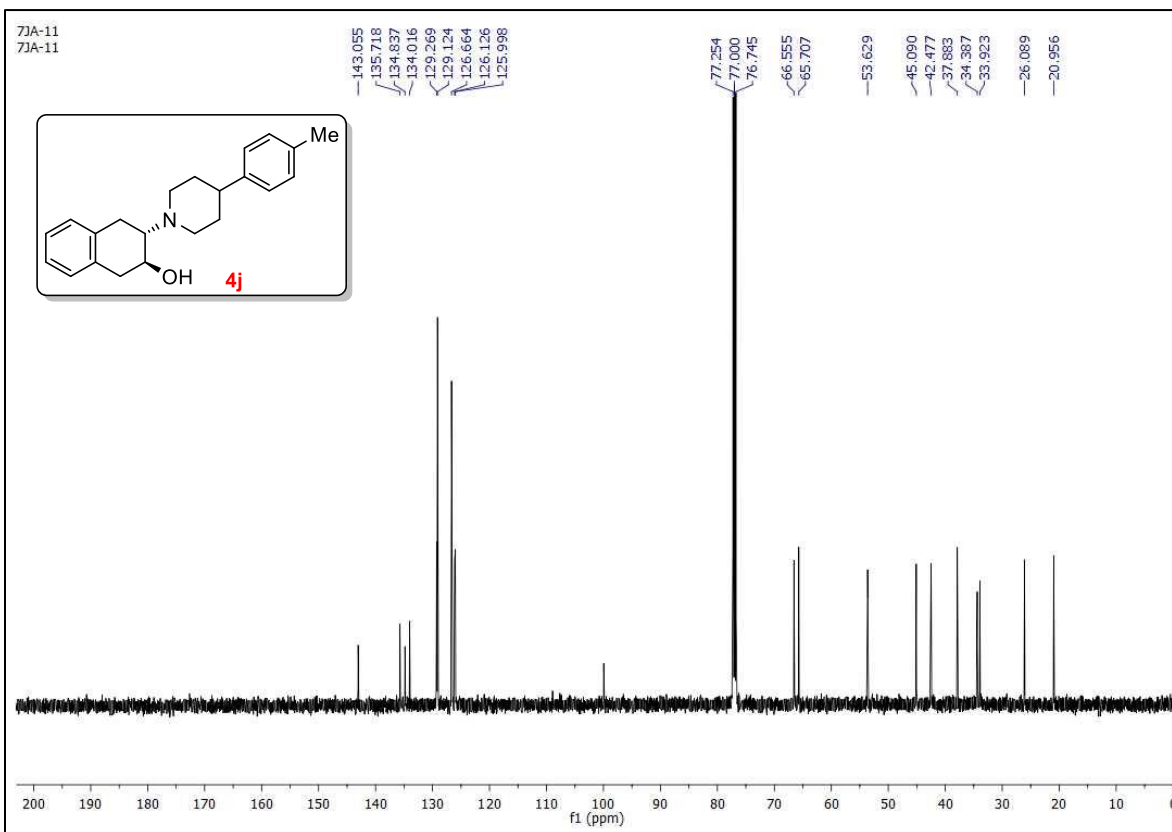

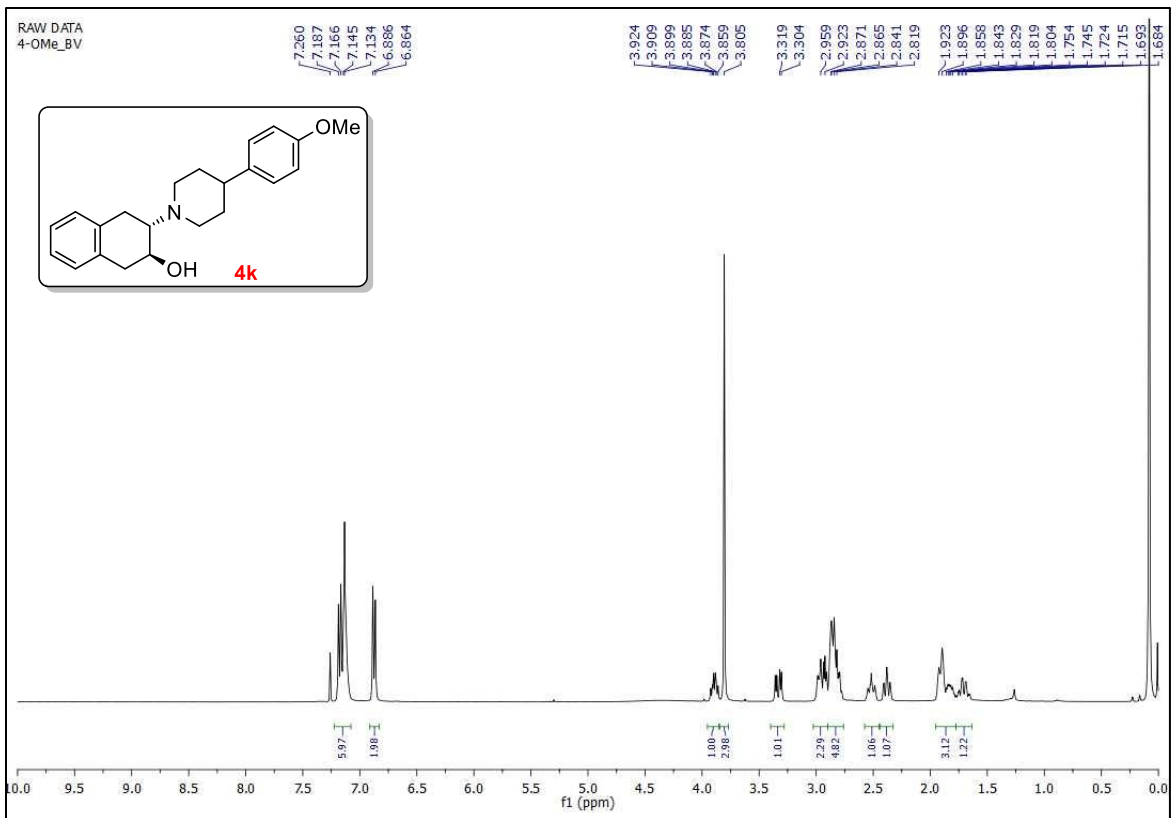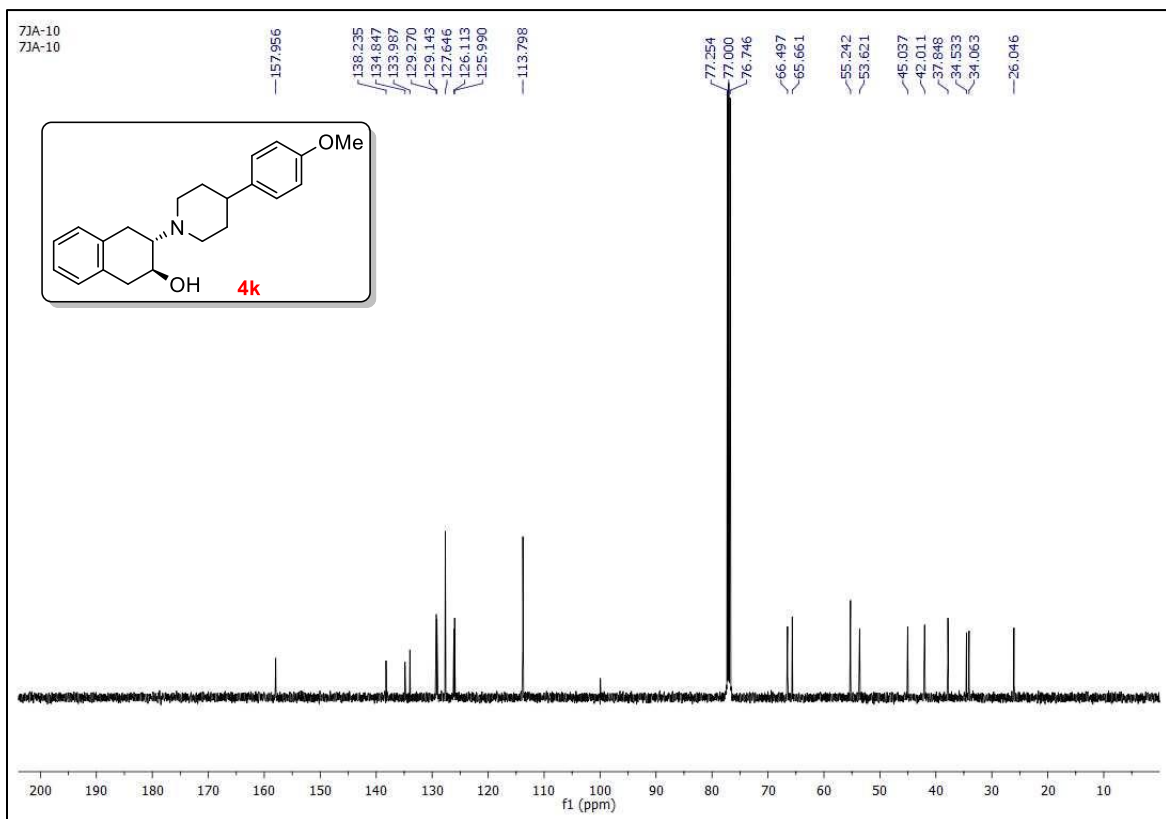

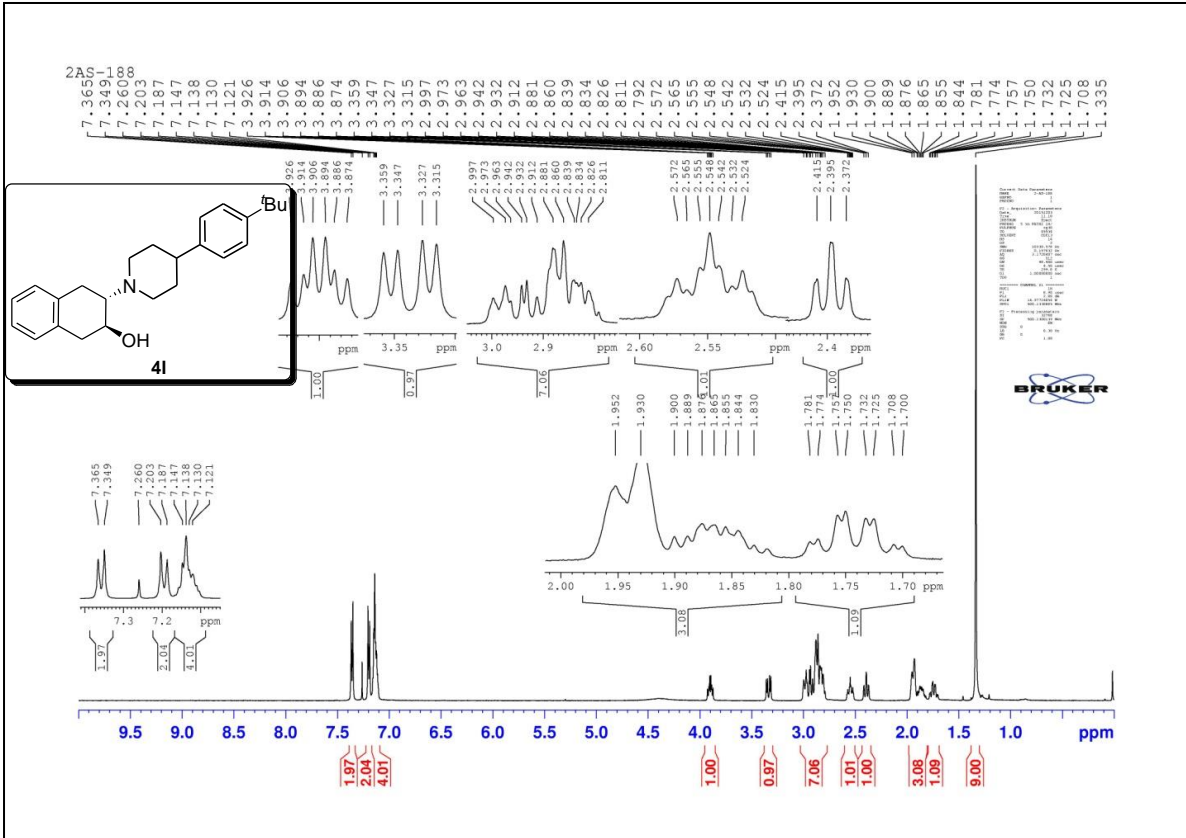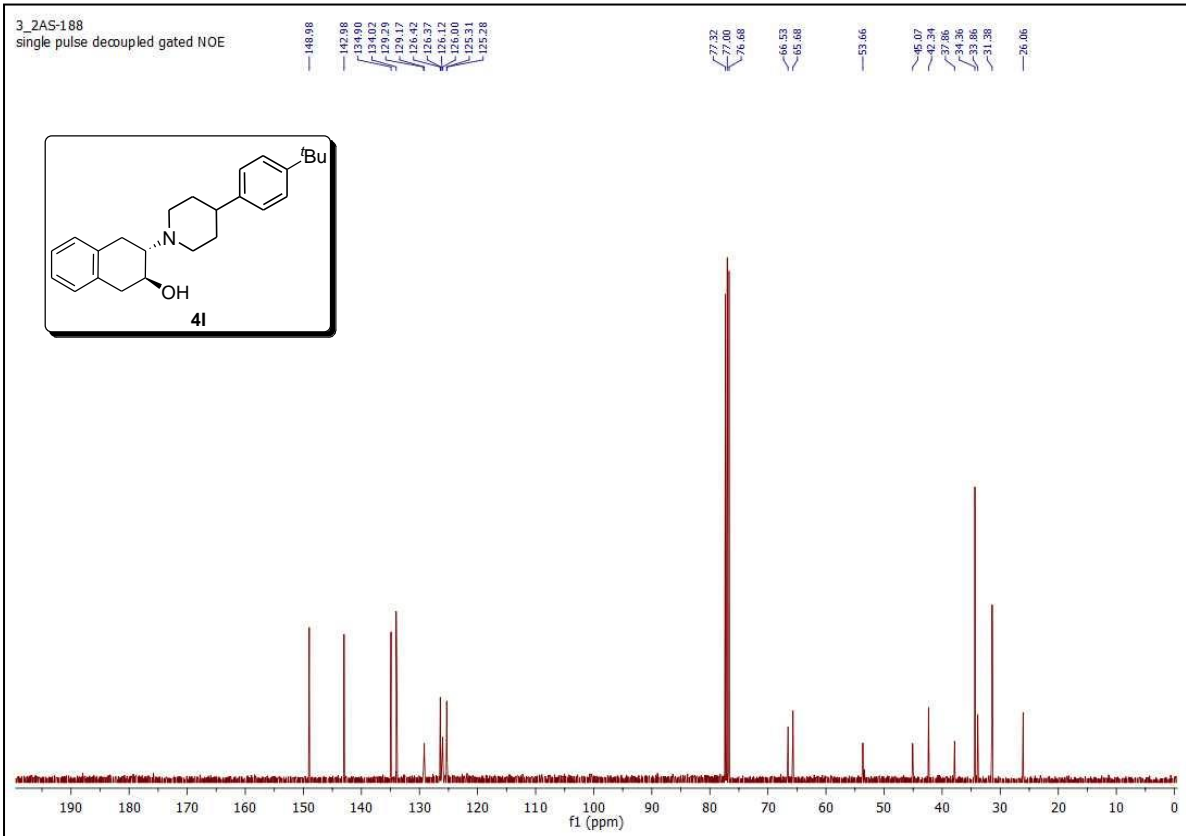

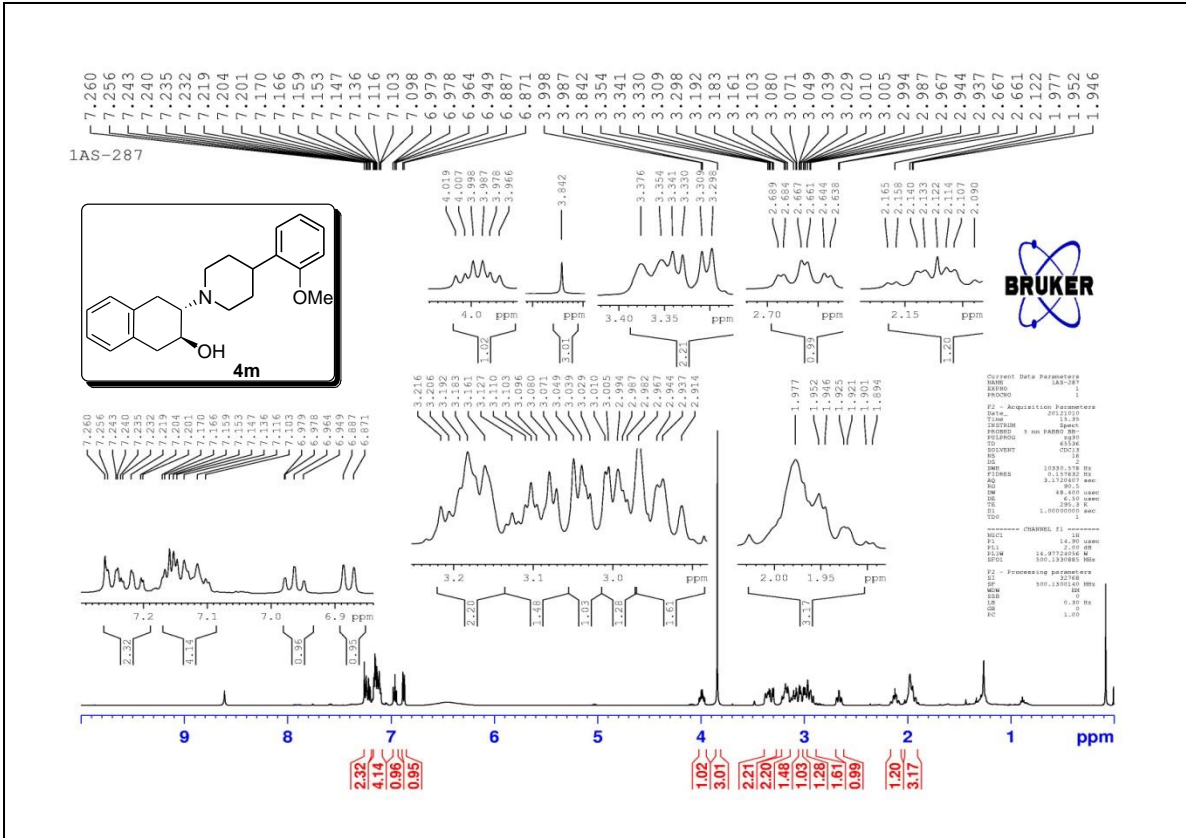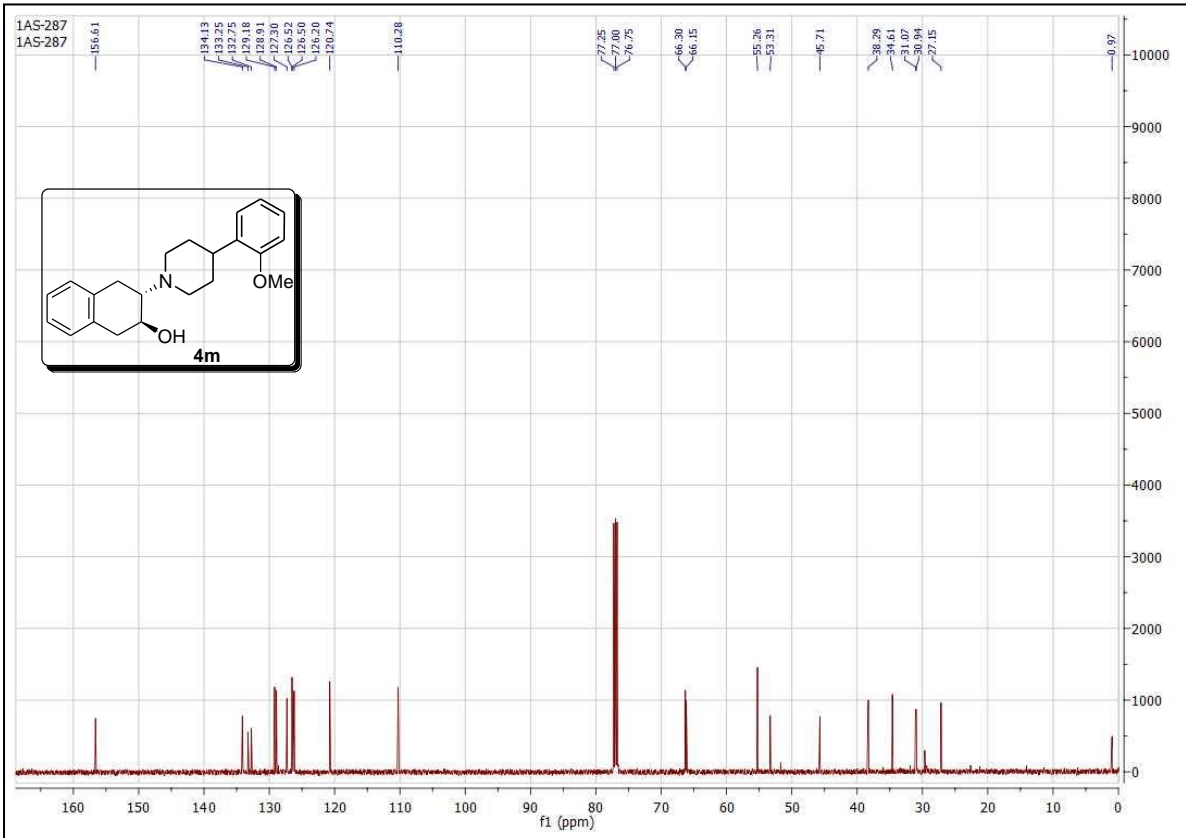



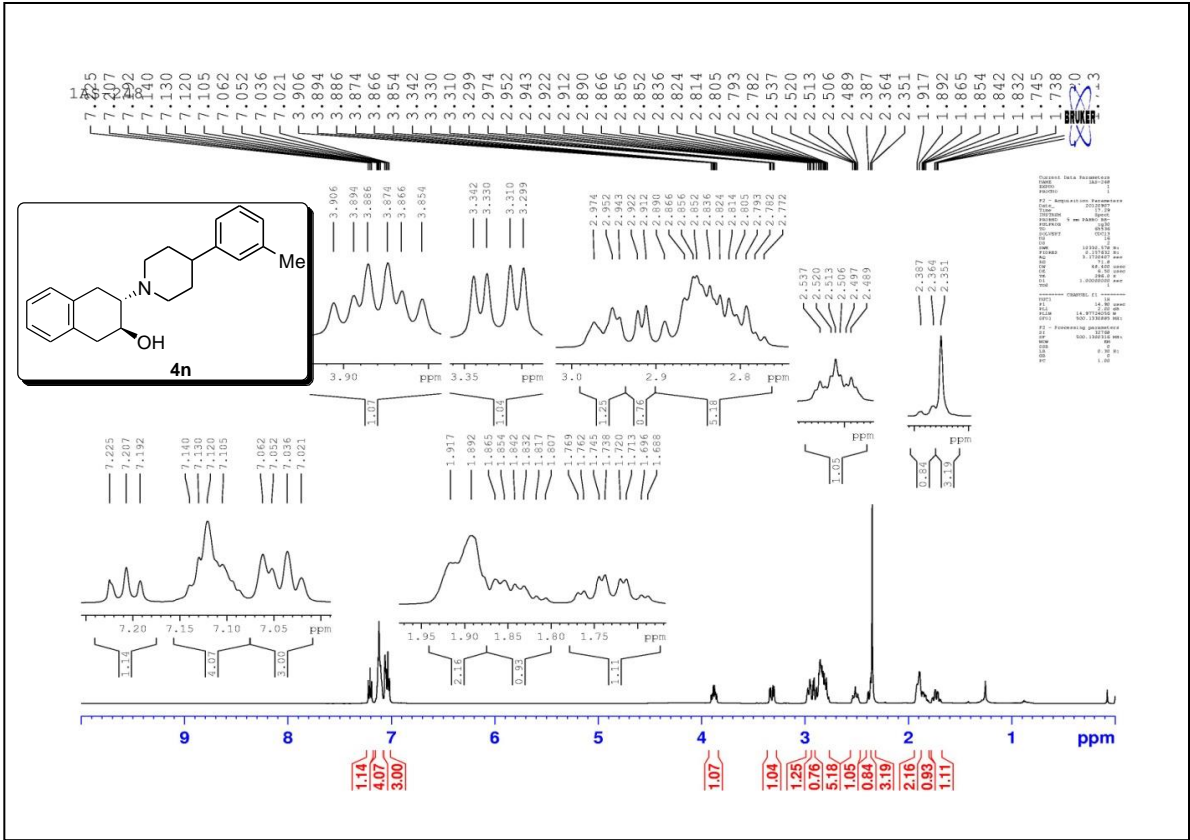



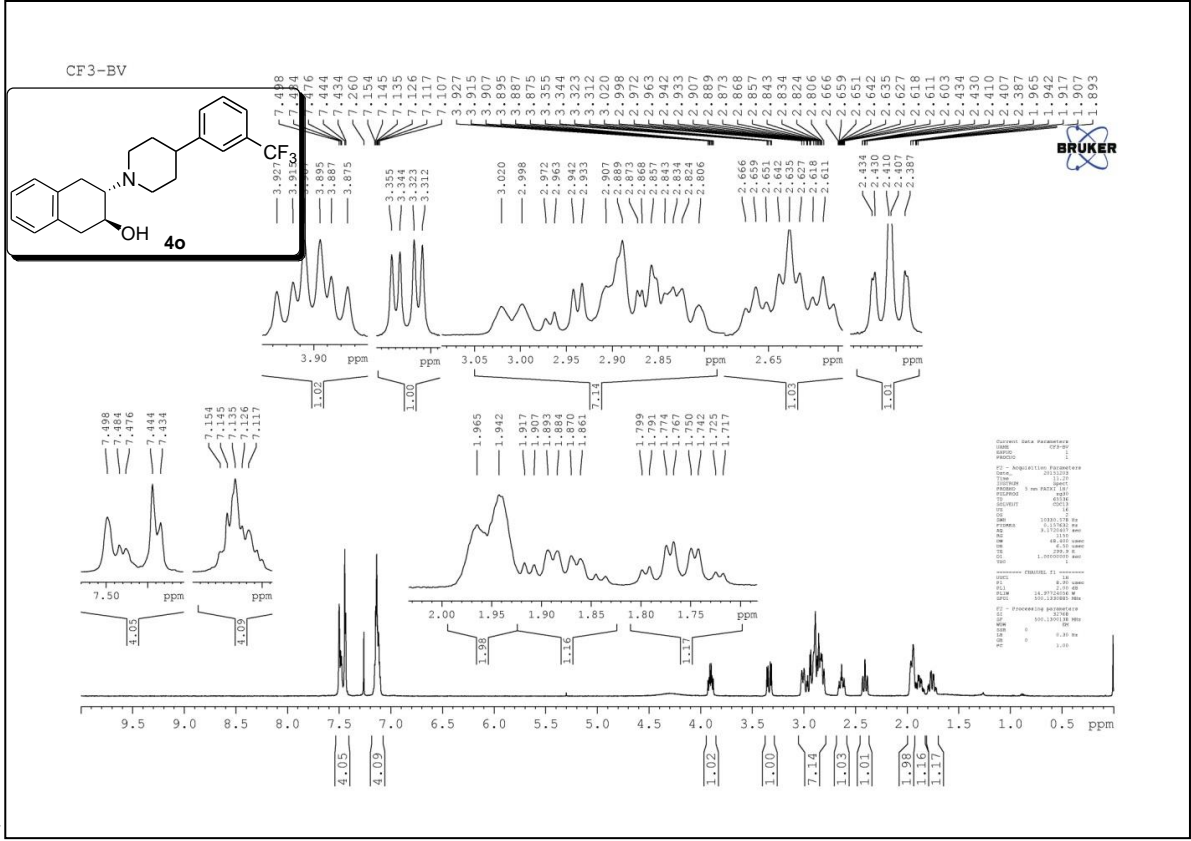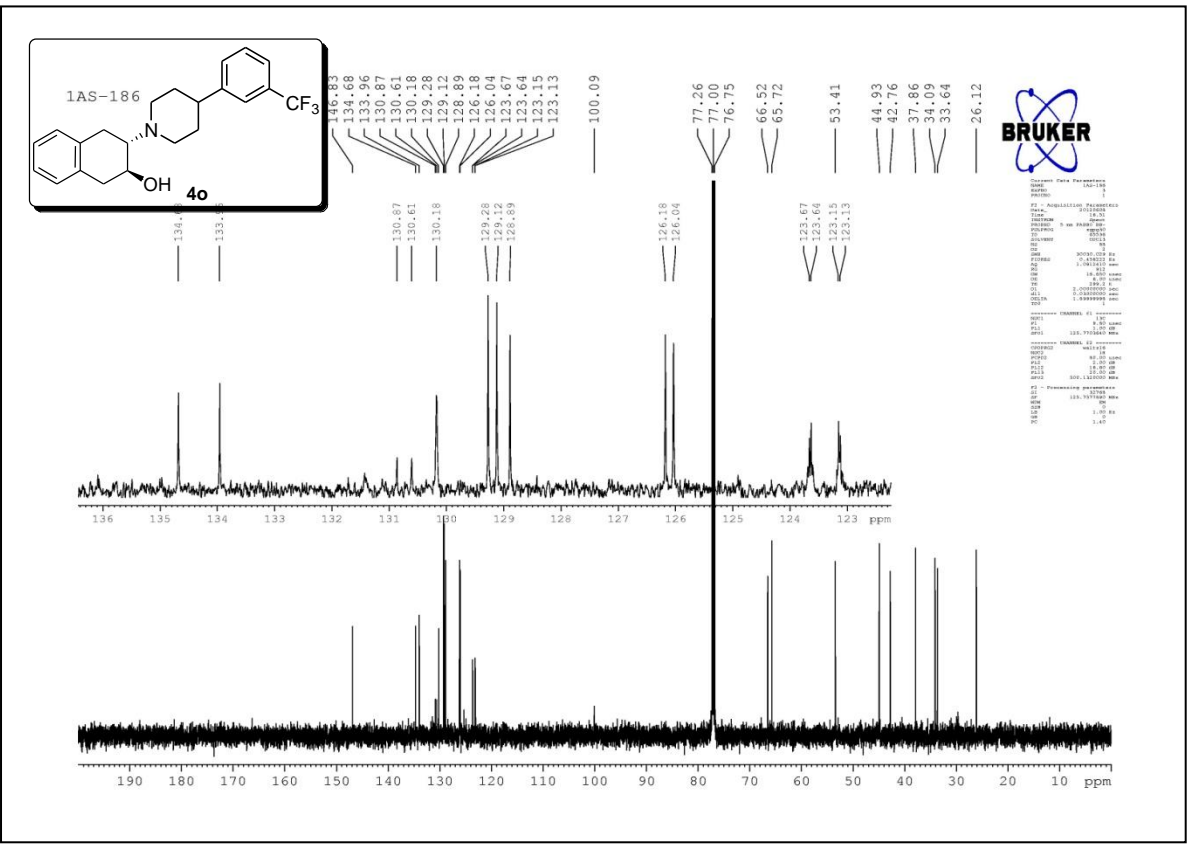

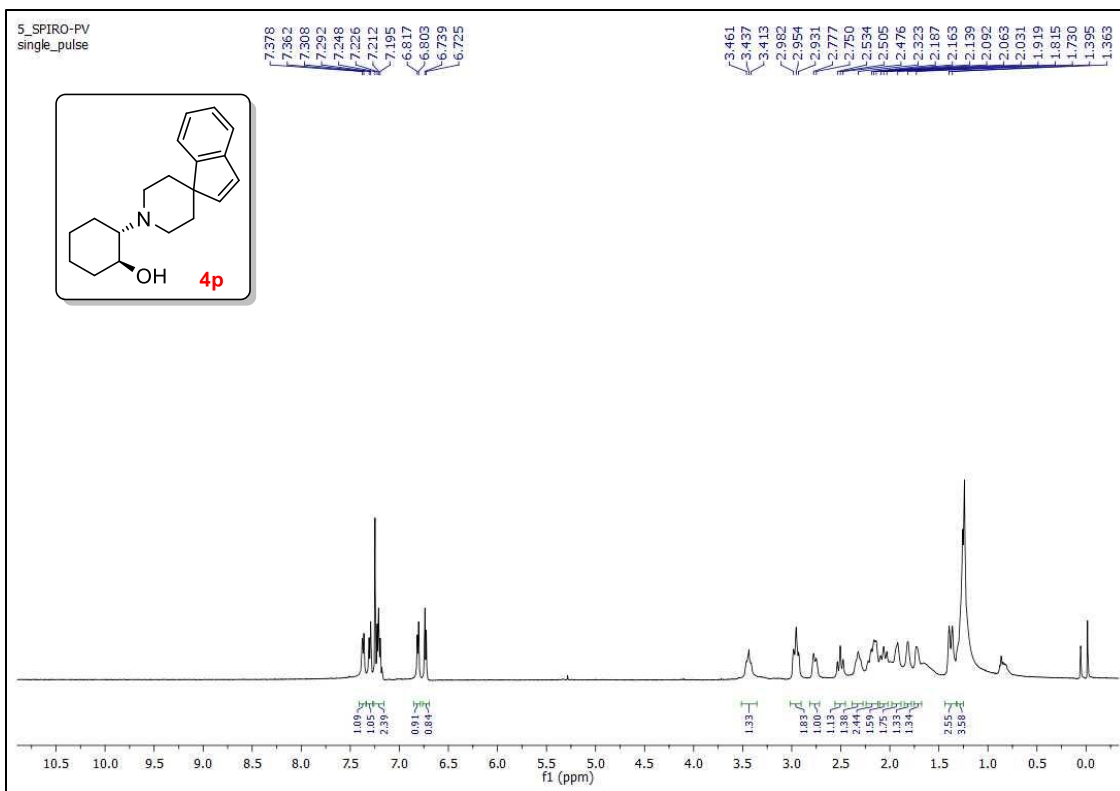

| S. No. | Product                                                                                          | Er       | HPLC data   |         |                  |                 |                 |
|--------|--------------------------------------------------------------------------------------------------|----------|-------------|---------|------------------|-----------------|-----------------|
|        |                                                                                                  |          | Column      | Hex:IPA | flow rate mL/min | t <sub>R1</sub> | t <sub>R2</sub> |
| 1      | 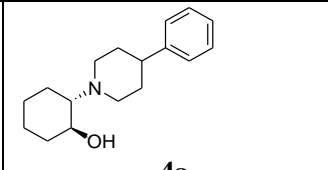<br><b>4a</b>   | >99:1    | AD-H        | 95:5    | 0.5 mL/min       | 14.4            | 16.1            |
| 2      | <br><b>4b</b>   | >99:1    | Amylose-2   | 97:3    | 0.5 mL/min       | 14.0            | 15.2            |
| 3      | <br><b>4c</b>   | >99:1    | Cellulose-2 | 97:3    | 0.5 mL/min       | 23.7            | 26.3            |
| 4      | <br><b>4d</b>  | 96:4     | AD-H        | 95:5    | 0.3 mL/min       | 21.6            | 24.8            |
| 5      | <br><b>4e</b> | 81:19    | AD-H        | 90:10   | 0.5 mL/min       | 32.9            | 41.7            |
| 6      | <br><b>4f</b> | 85:15    | OD-H        | 98:2    | 0.5 mL/min       | 36.5            | 42.1            |
| 7      | <br><b>4g</b> | 94:6     | Cellulose-2 | 95:5    | 0.5 mL/min       | 15.6            | 18.6            |
| 8      | <br><b>4h</b> | 92.5:7.5 | Amylose-2   | 95:5    | 0.5 mL/min       | 15.4            | 17.5            |

| S. No. | Product                                                                                          | Er    | HPLC data   |         |                  |                 |                 |
|--------|--------------------------------------------------------------------------------------------------|-------|-------------|---------|------------------|-----------------|-----------------|
|        |                                                                                                  |       | Column      | Hex:IPA | flow rate mL/min | t <sub>R1</sub> | t <sub>R2</sub> |
| 9      | 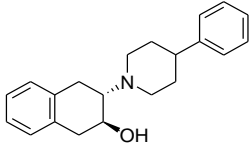<br><b>4i</b>   | 96:4  | OD-H        | 95:5    | 0.5 mL/min       | 25.4            | 27.9            |
| 10     | <br><b>4j</b>   | 90:10 | Cellulose-2 | 90:10   | 1.0 mL/min       | 6.7             | 8.1             |
| 11     | <br><b>4k</b>   | >99:1 | OD-H        | 97:3    | 0.4 mL/min       | 37.1            | 42.8            |
| 12     | <br><b>4l</b>  | 96:4  | Cellulose-2 | 95:5    | 0.5 mL/min       | 12.4            | 16.1            |
| 13     | <br><b>4m</b> | 99:1  | AD-H        | 95:5    | 0.5 mL/min       | 21.0            | 23.2            |
| 14     | <br><b>4n</b> | >99:1 | AD-H        | 95:5    | 0.5 mL/min       | 15.4            | 17.3            |
| 15     | <br><b>4o</b> | 88:12 | Cellulose-2 | 95:5    | 0.5 mL/min       | 18.7            | 26.5            |
| 16     | <br><b>4p</b> | >99:1 | OD-H        | 99:1    | 0.4 mL/min       | 30.5            | 48.3            |

Sample : 1AS-10\_NEW  
 Inj. Volume [ml] : 0  
 ISTD Amount : 0  
 Dilution : 1

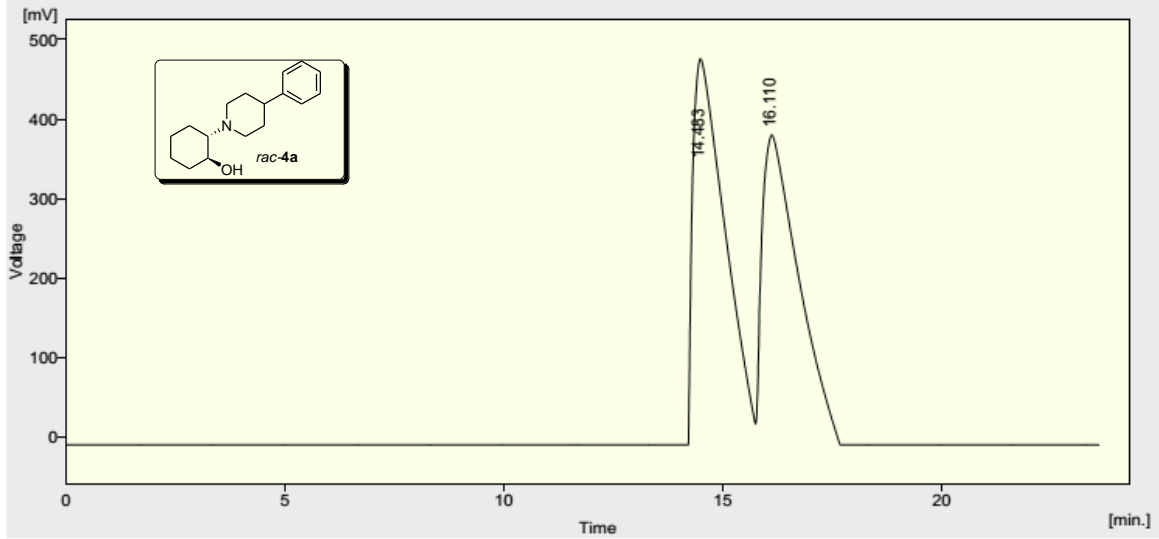

Result Table (Uncal - C:\DOCUMENTS AND SETTINGS\ADMINISTRATOR\DESKTOP\1AS-10\_RECIMIC\_NEW)

|       | Reten. Time [min] | Area [mV.s] | Height [mV] | Area [%] | Height [%] | W05 [min] |
|-------|-------------------|-------------|-------------|----------|------------|-----------|
| 1     | 14.483            | 24735.047   | 486.364     | 52.2     | 55.5       | 0.85      |
| 2     | 16.110            | 22628.630   | 390.141     | 47.8     | 44.5       | 0.94      |
| Total |                   | 47363.676   | 876.505     | 100.0    | 100.0      |           |

Sample ID : 1AS-10  
 Sample : 1AS-10  
 Inj. Volume [ml] : 0  
 Amount : 0  
 ISTD Amount : 0  
 Dilution : 1

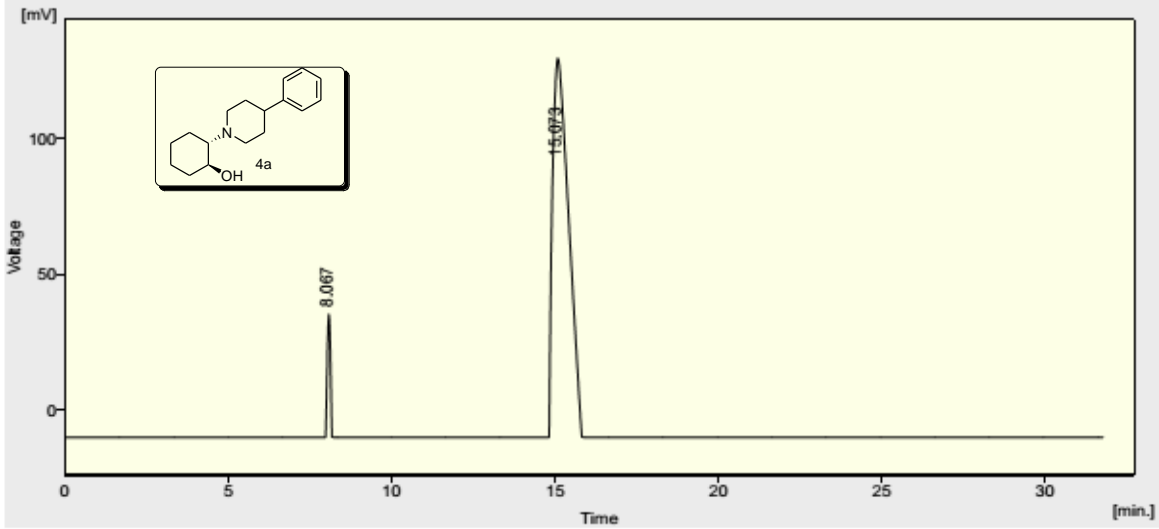

Result Table (Uncal - F:\Arun\_Asymmetric\1AS-10)

|       | Reten. Time [min] | Area [mV.s] | Height [mV] | Area [%] | Height [%] | W05 [min] |
|-------|-------------------|-------------|-------------|----------|------------|-----------|
| 1     | 8.067             | 310.515     | 45.309      | 6.1      | 24.5       | 0.12      |
| 2     | 15.073            | 4766.907    | 139.547     | 93.9     | 75.5       | 0.59      |
| Total |                   | 5077.422    | 184.856     | 100.0    | 100.0      |           |

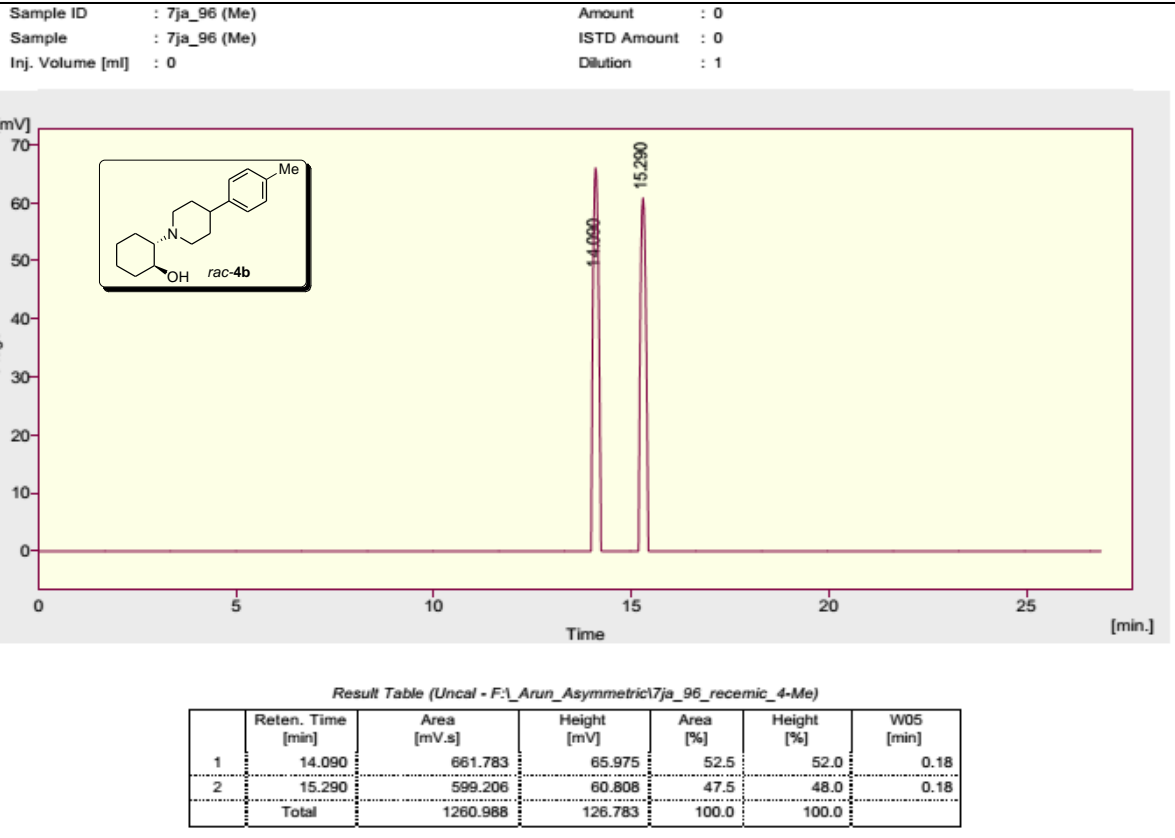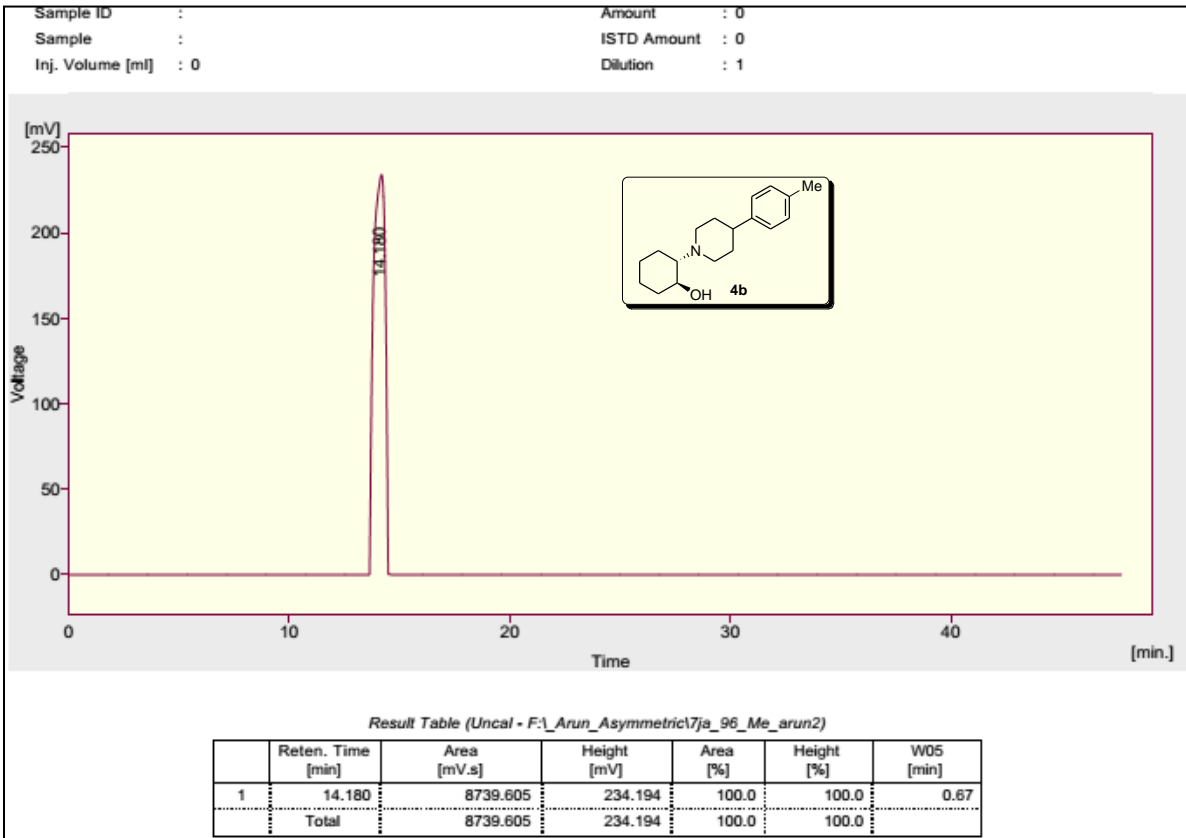

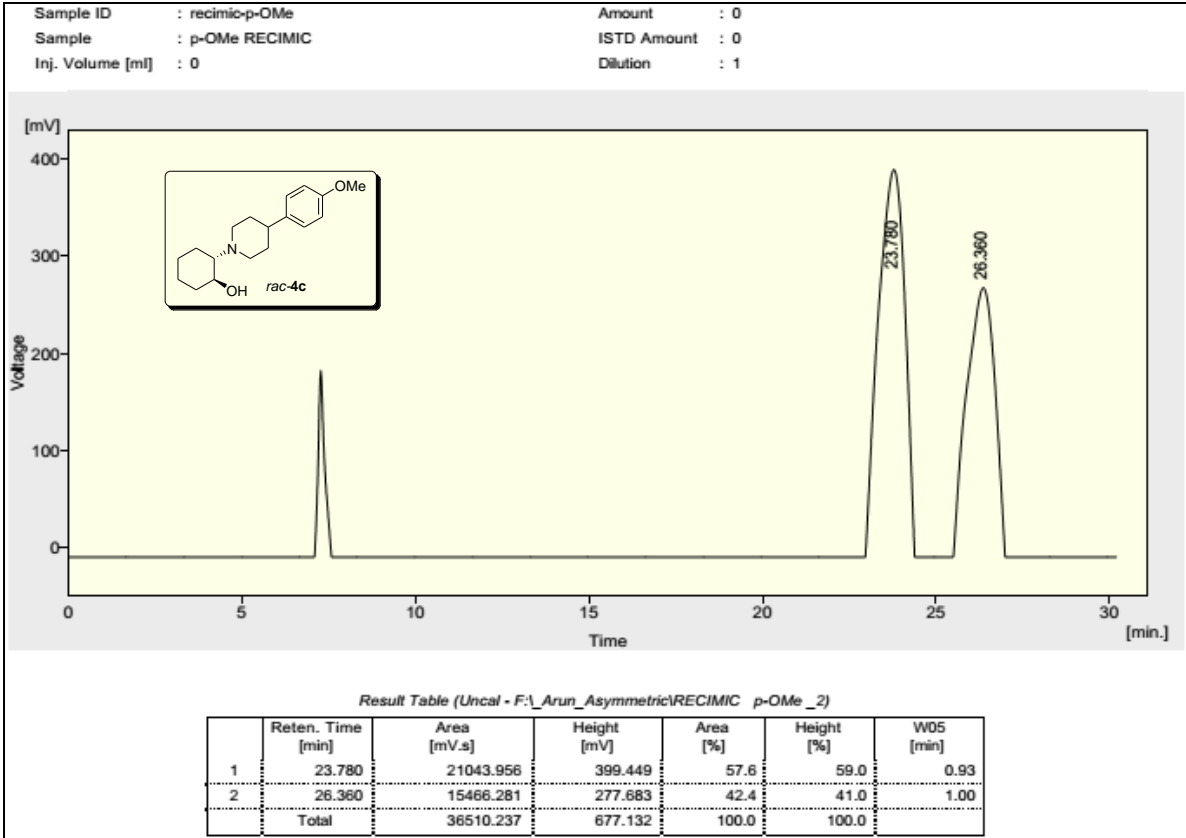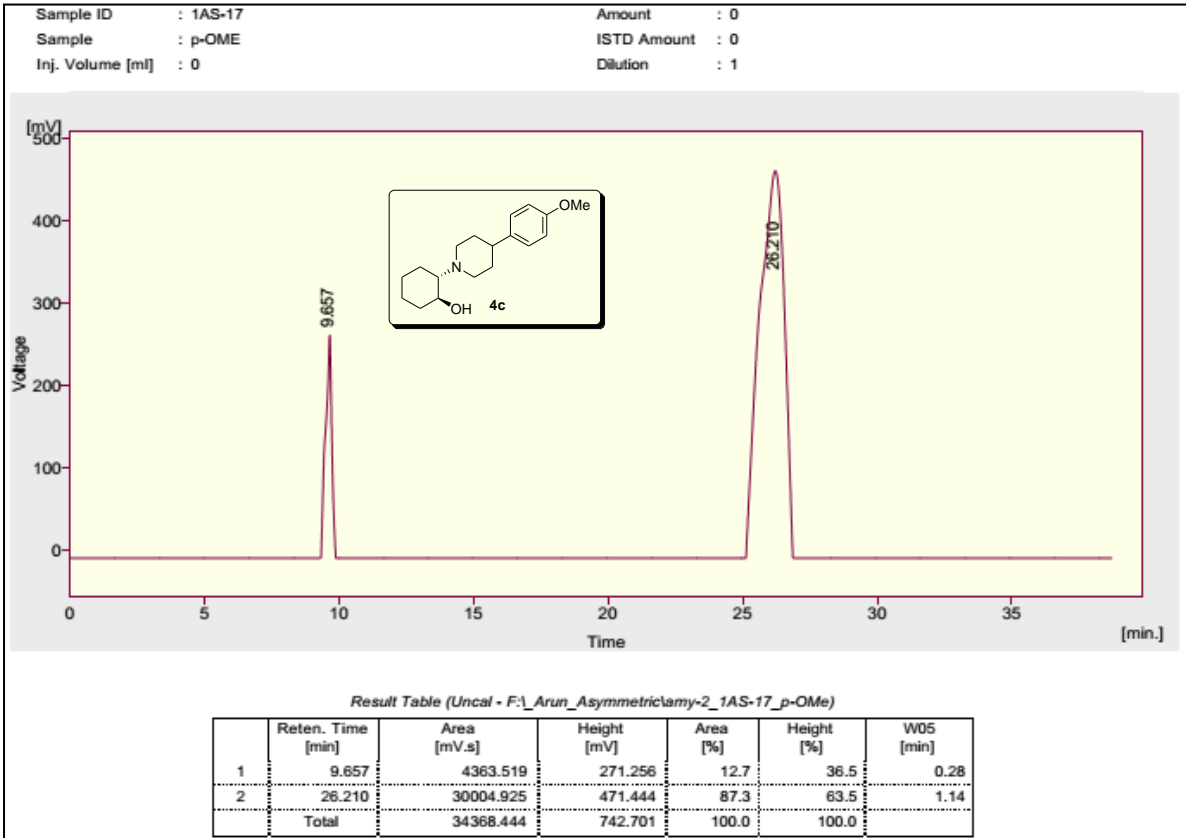

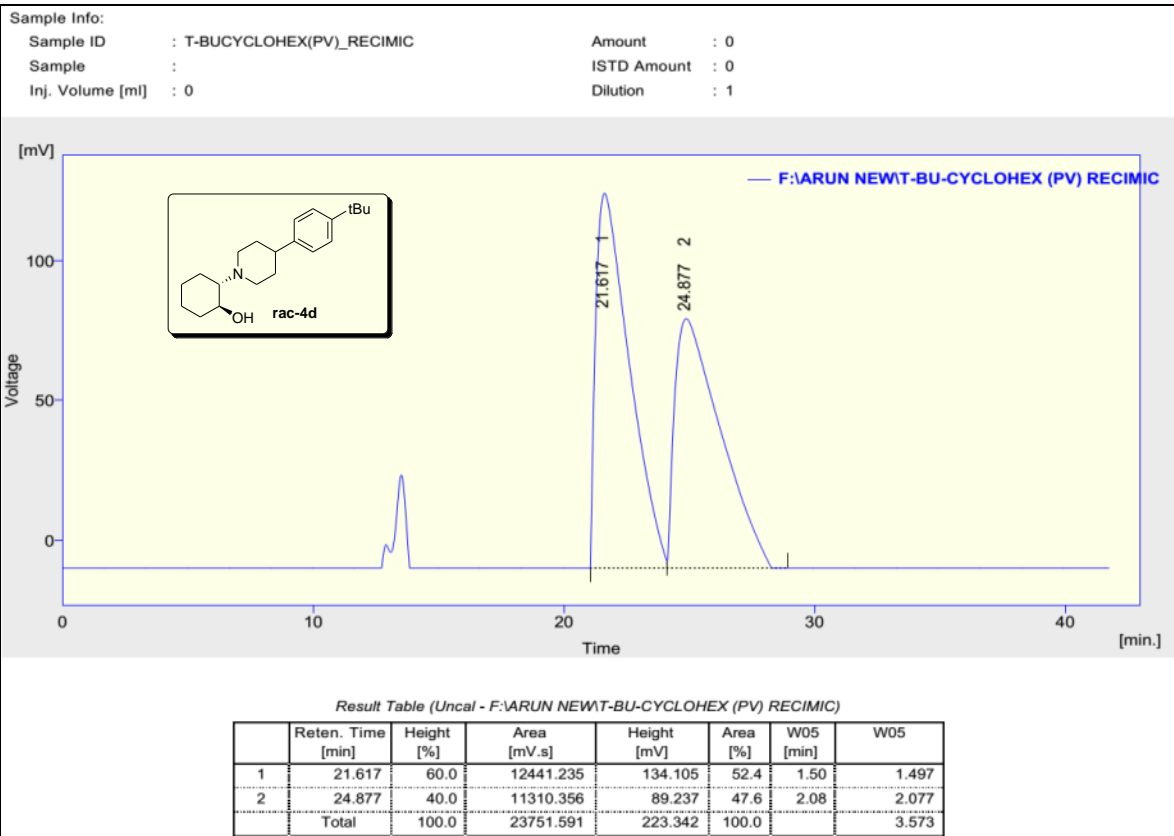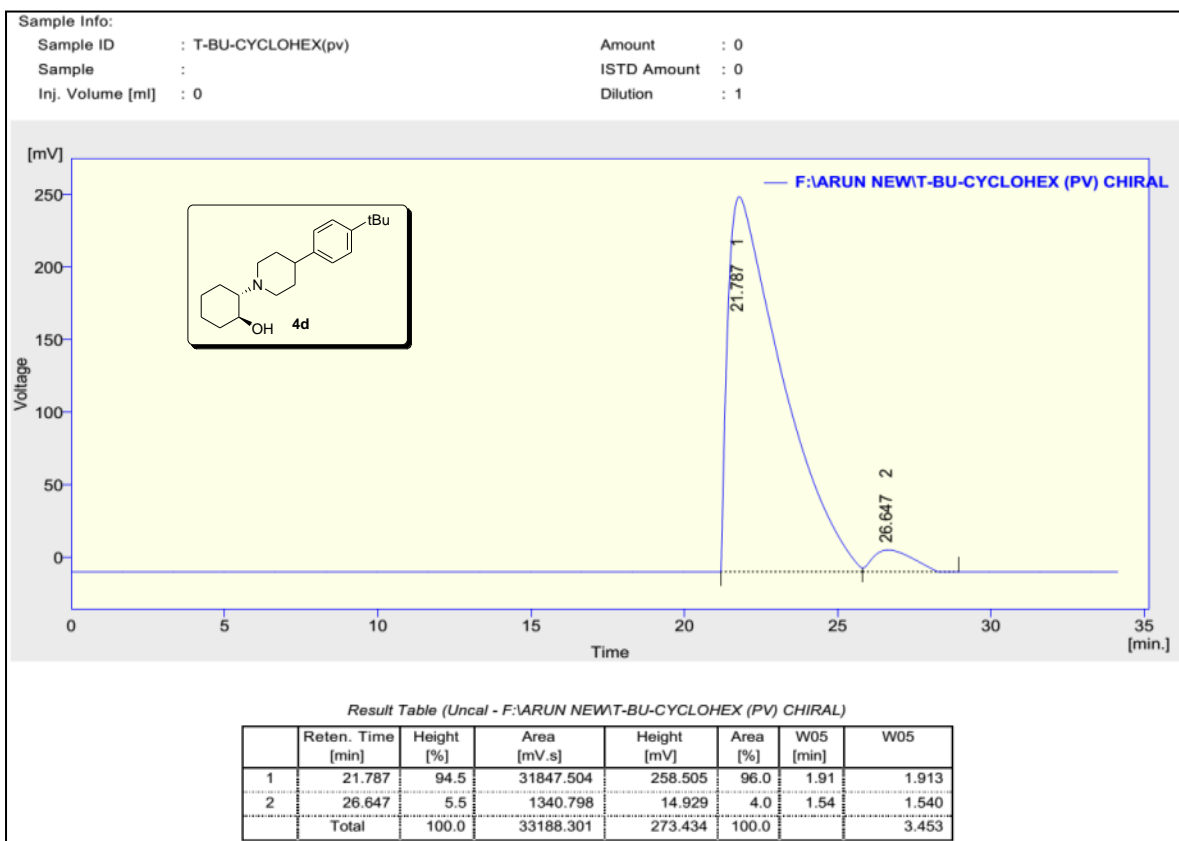



Sample Info:

Sample ID : 4-NO2-PV-RACEMIC  
 Sample :  
 Inj. Volume [ml] : 0

Amount : 0  
 ISTD Amount : 0  
 Dilution : 1

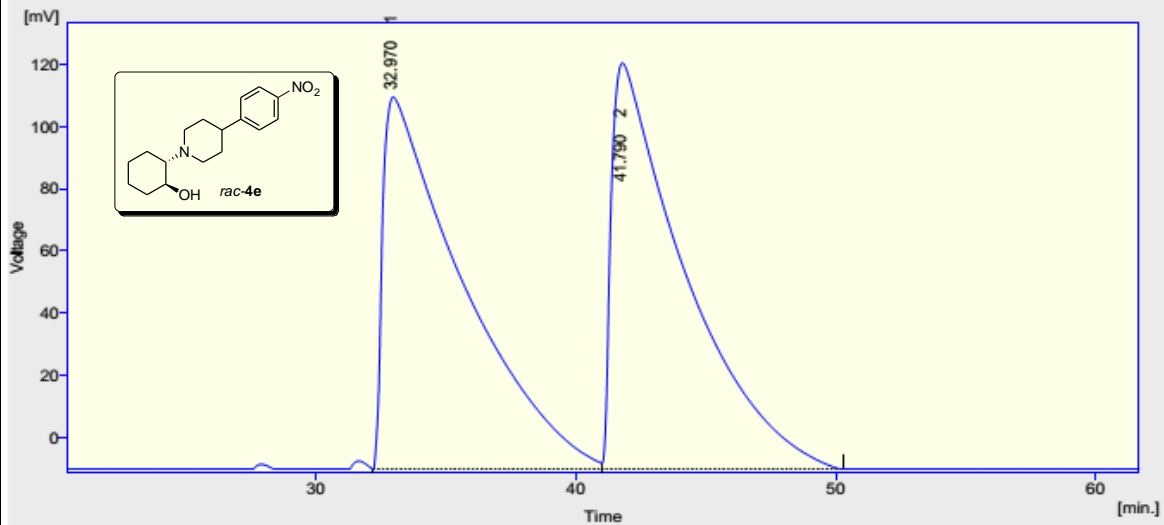

Result Table (Uncal - F:\arun water\4-NO2-PV-RACEMIC)

|   | Reten. Time [min] | Height [%] | Area [mV.s] | Height [mV] | Area [%] | W05 [min] | W05   |
|---|-------------------|------------|-------------|-------------|----------|-----------|-------|
| 1 | 32.970            | 47.8       | 25442.995   | 119.436     | 50.0     | 3.16      | 3.160 |
| 2 | 41.790            | 52.2       | 25427.455   | 130.363     | 50.0     | 2.83      | 2.830 |
|   | Total             | 100.0      | 50870.451   | 249.798     | 100.0    |           | 5.990 |

Sample Info:

Sample ID : A-4-NO2-CHIRAL-2.  
 Sample :  
 Inj. Volume [ml] : 0

Amount : 0  
 ISTD Amount : 0  
 Dilution : 1

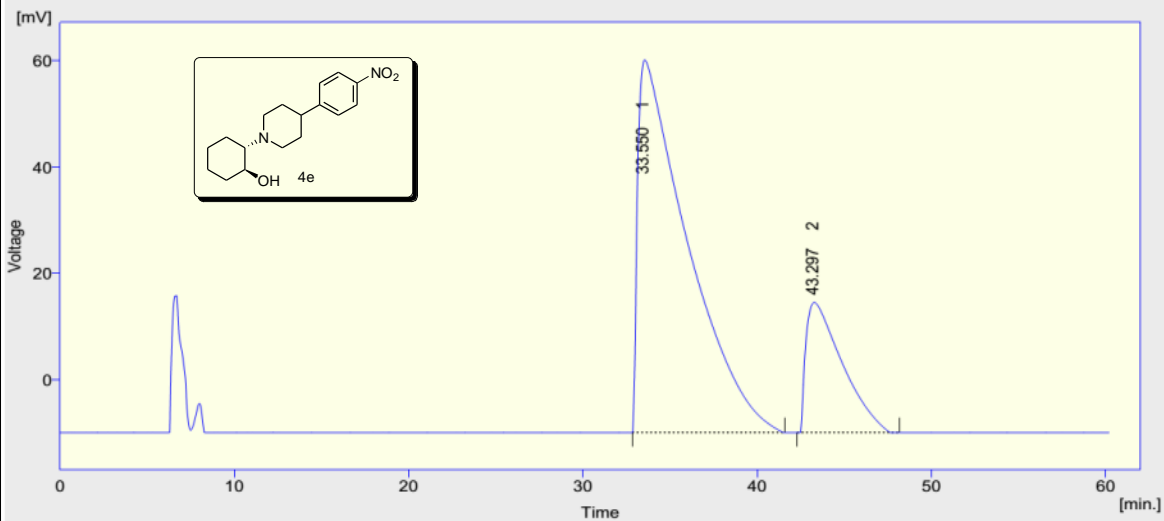

Result Table (Uncal - F:\arun water\A-4-NO2-CHIRAL-2.)

|   | Reten. Time [min] | Height [%] | Area [mV.s] | Height [mV] | Area [%] | W05 [min] | W05   |
|---|-------------------|------------|-------------|-------------|----------|-----------|-------|
| 1 | 33.550            | 74.1       | 13927.099   | 70.161      | 79.7     | 2.99      | 2.990 |
| 2 | 43.297            | 25.9       | 3542.199    | 24.469      | 20.3     | 2.30      | 2.303 |
|   | Total             | 100.0      | 17469.297   | 94.630      | 100.0    |           | 5.293 |

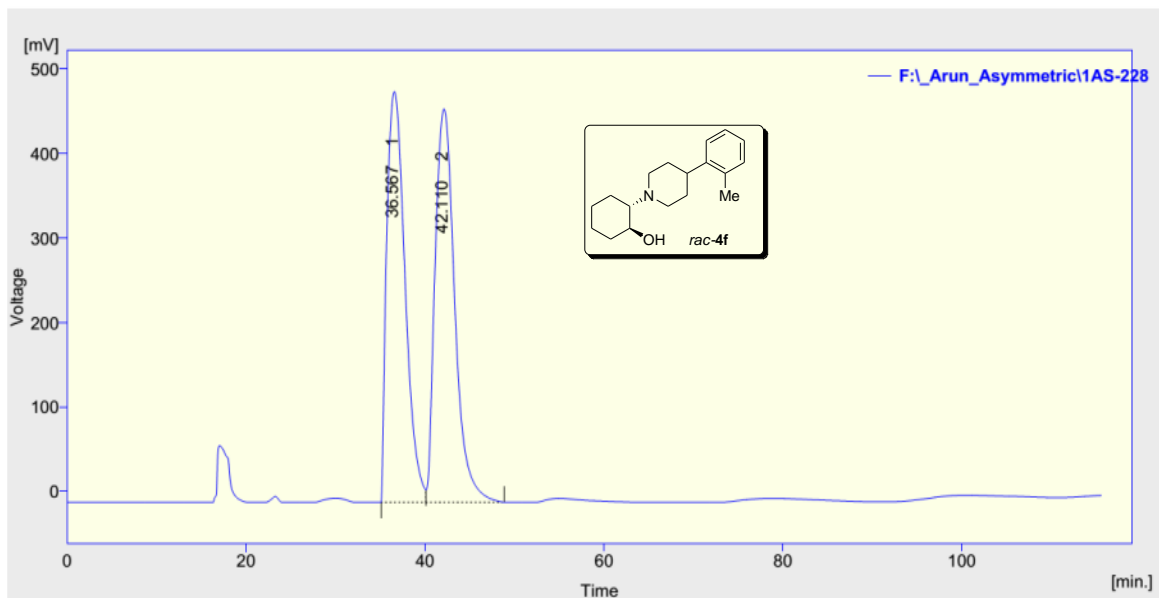

Result Table (Uncal - F:\\_Arun\_Asymmetric1AS-228)

|   | Reten. Time [min] | Area [mV.s] | Height [mV] | Area [%] | Height [%] | W05 [min] |
|---|-------------------|-------------|-------------|----------|------------|-----------|
| 1 | 36.567            | 68855.968   | 486.469     | 49.2     | 51.1       | 2.28      |
| 2 | 42.110            | 71057.467   | 465.940     | 50.8     | 48.9       | 2.36      |
|   | Total             | 139913.436  | 952.409     | 100.0    | 100.0      |           |

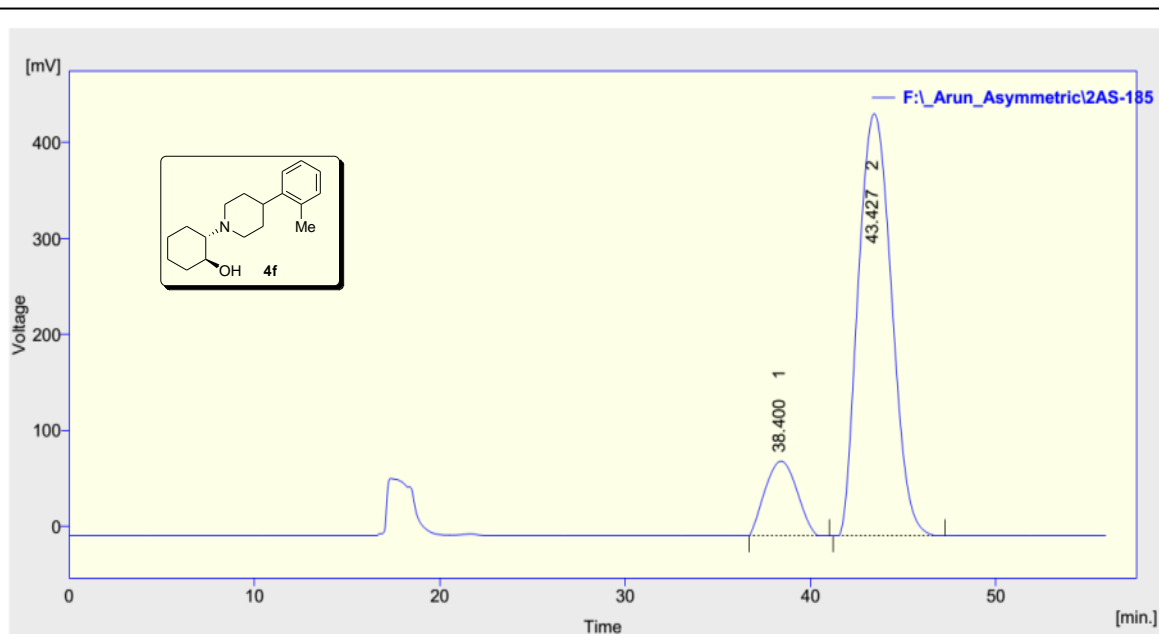

Result Table (Uncal - F:\\_Arun\_Asymmetric2AS-185)

|   | Reten. Time [min] | Area [mV.s] | Height [mV] | Area [%] | Height [%] | W05 [min] |
|---|-------------------|-------------|-------------|----------|------------|-----------|
| 1 | 38.400            | 9314.632    | 77.924      | 14.5     | 15.0       | 2.01      |
| 2 | 43.427            | 54796.318   | 440.304     | 85.5     | 85.0       | 2.03      |
|   | Total             | 64110.950   | 518.229     | 100.0    | 100.0      |           |

Sample ID : 2-OMe-CYCLOHEXANE-RECIMIC(1AS-253) Amount : 0  
 Sample : ISTD Amount : 0  
 Inj. Volume [ml] : 0 Dilution : 1

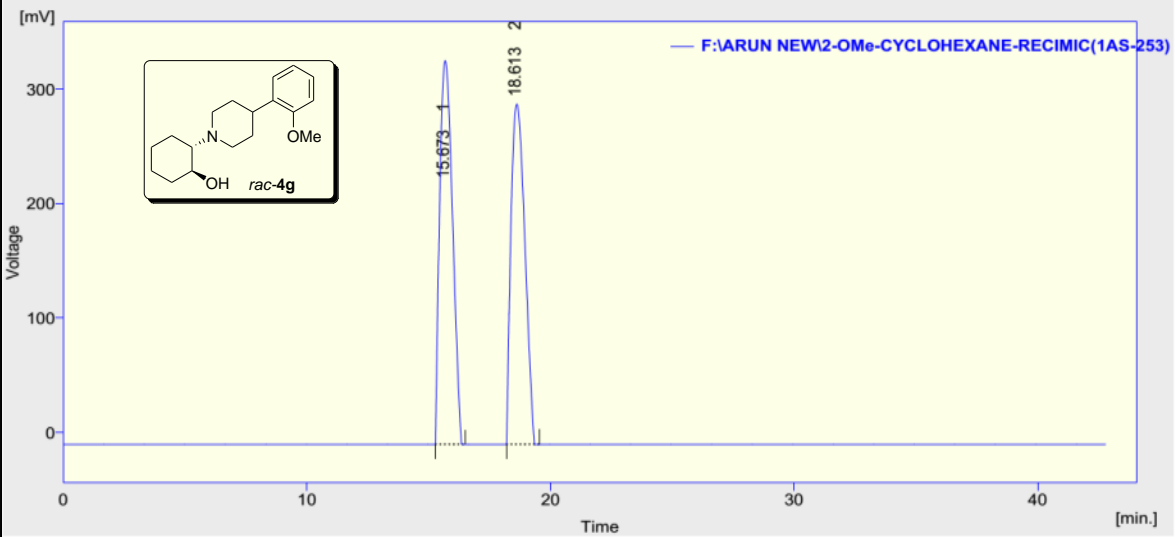

Result Table (Uncal - F:\ARUN NEW\2-OMe-CYCLOHEXANE-RECIMIC(1AS-253))

|       | Reten. Time [min] | Height [%] | Area [mV.s] | Height [mV] | Area [%] | W05 [min] | W05   |
|-------|-------------------|------------|-------------|-------------|----------|-----------|-------|
| 1     | 15.673            | 53.0       | 12197.568   | 334.643     | 51.0     | 0.62      | 0.620 |
| 2     | 18.613            | 47.0       | 11722.034   | 296.799     | 49.0     | 0.67      | 0.673 |
| Total |                   | 100.0      | 23919.601   | 631.442     | 100.0    |           | 1.293 |

Sample Info:

Sample ID : 2-OMe\_CYCLOHEXANE(pv) Amount : 0  
 Sample : ISTD Amount : 0  
 Inj. Volume [ml] : 0 Dilution : 1

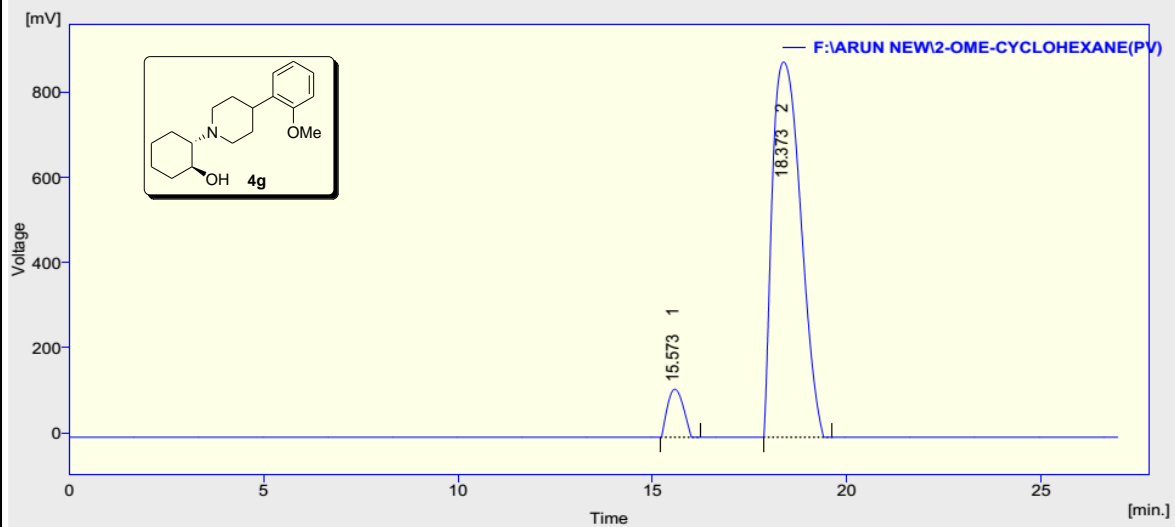

Result Table (Uncal - F:\ARUN NEW\2-OMe-CYCLOHEXANE(PV))

|       | Reten. Time [min] | Height [%] | Area [mV.s] | Height [mV] | Area [%] | W05 [min] | W05   |
|-------|-------------------|------------|-------------|-------------|----------|-----------|-------|
| 1     | 15.573            | 11.4       | 3195.422    | 113.016     | 6.7      | 0.49      | 0.490 |
| 2     | 18.373            | 88.6       | 44729.683   | 881.205     | 93.3     | 0.84      | 0.843 |
| Total |                   | 100.0      | 47925.104   | 994.221     | 100.0    |           | 1.333 |

Sample Info:

Sample ID : 3-Me\_PV-R  
 Sample :  
 Inj. Volume [ml] : 0

Amount : 0  
 ISTD Amount : 0  
 Dilution : 1

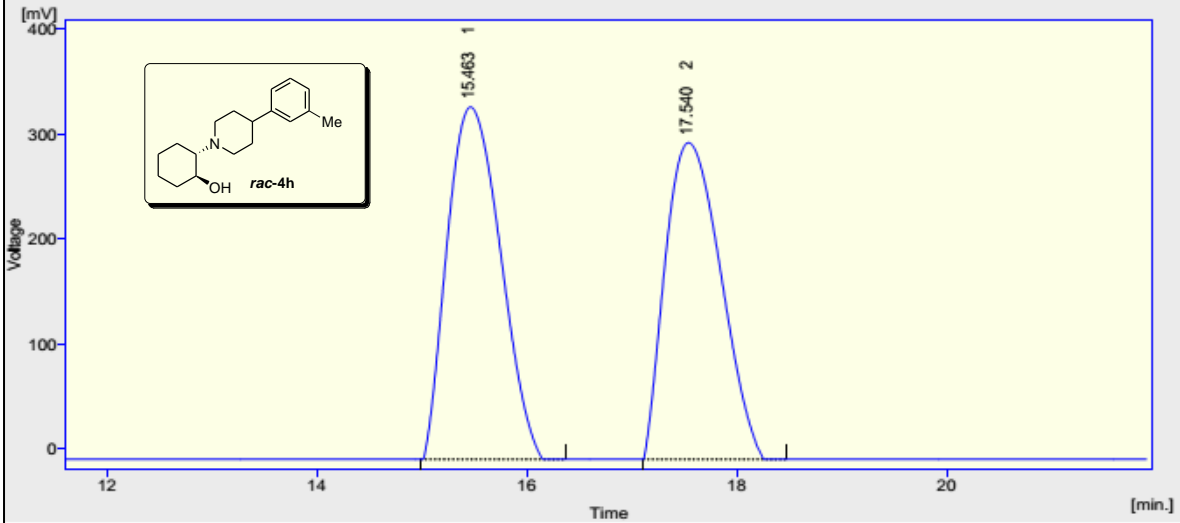

Result Table (Uncal - F:\\_Arun\_Asymmetric\3-Me\_PV-R)

|   | Reten. Time [min] | Height [%] | Area [mV.s] | Height [mV] | Area [%] | W05 [min] | W05   |
|---|-------------------|------------|-------------|-------------|----------|-----------|-------|
| 1 | 15.463            | 52.7       | 11825.093   | 335.756     | 51.7     | 0.59      | 0.587 |
| 2 | 17.540            | 47.3       | 11049.613   | 301.734     | 48.3     | 0.61      | 0.613 |
|   | Total             | 100.0      | 22874.707   | 637.490     | 100.0    |           | 1.200 |

Sample Info:

Sample ID : A-3Me\_PV  
 Sample :  
 Inj. Volume [ml] : 0

Amount : 0  
 ISTD Amount : 0  
 Dilution : 1

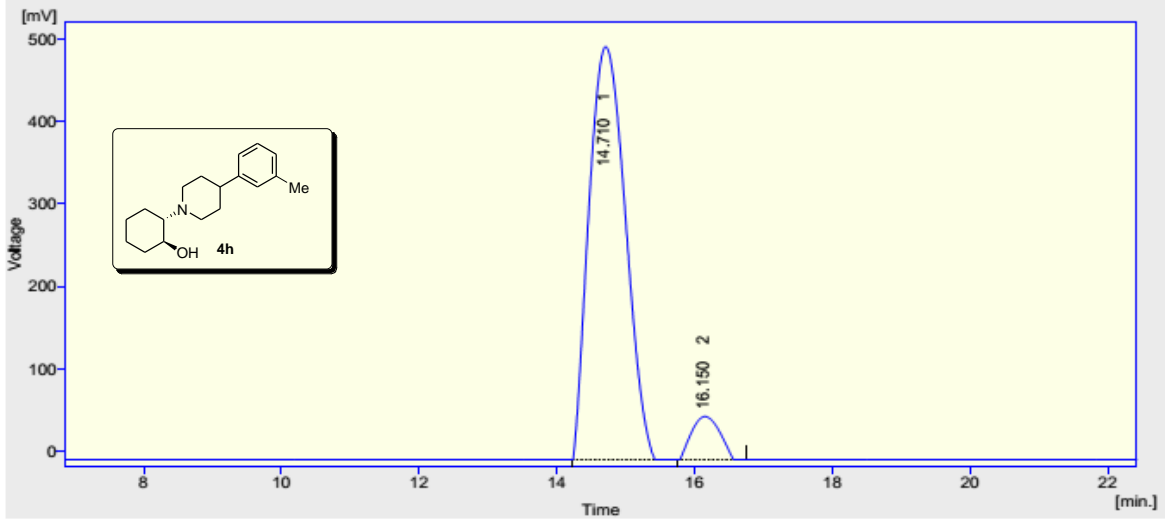

Result Table (Uncal - F:\\_Arun\_Asymmetric\A-3Me\_PV)

|   | Reten. Time [min] | Height [%] | Area [mV.s] | Height [mV] | Area [%] | W05 [min] | W05   |
|---|-------------------|------------|-------------|-------------|----------|-----------|-------|
| 1 | 14.710            | 90.6       | 18321.162   | 500.660     | 92.5     | 0.61      | 0.613 |
| 2 | 16.150            | 9.4        | 1491.905    | 52.202      | 7.5      | 0.50      | 0.497 |
|   | Total             | 100.0      | 19813.067   | 552.862     | 100.0    |           | 1.110 |

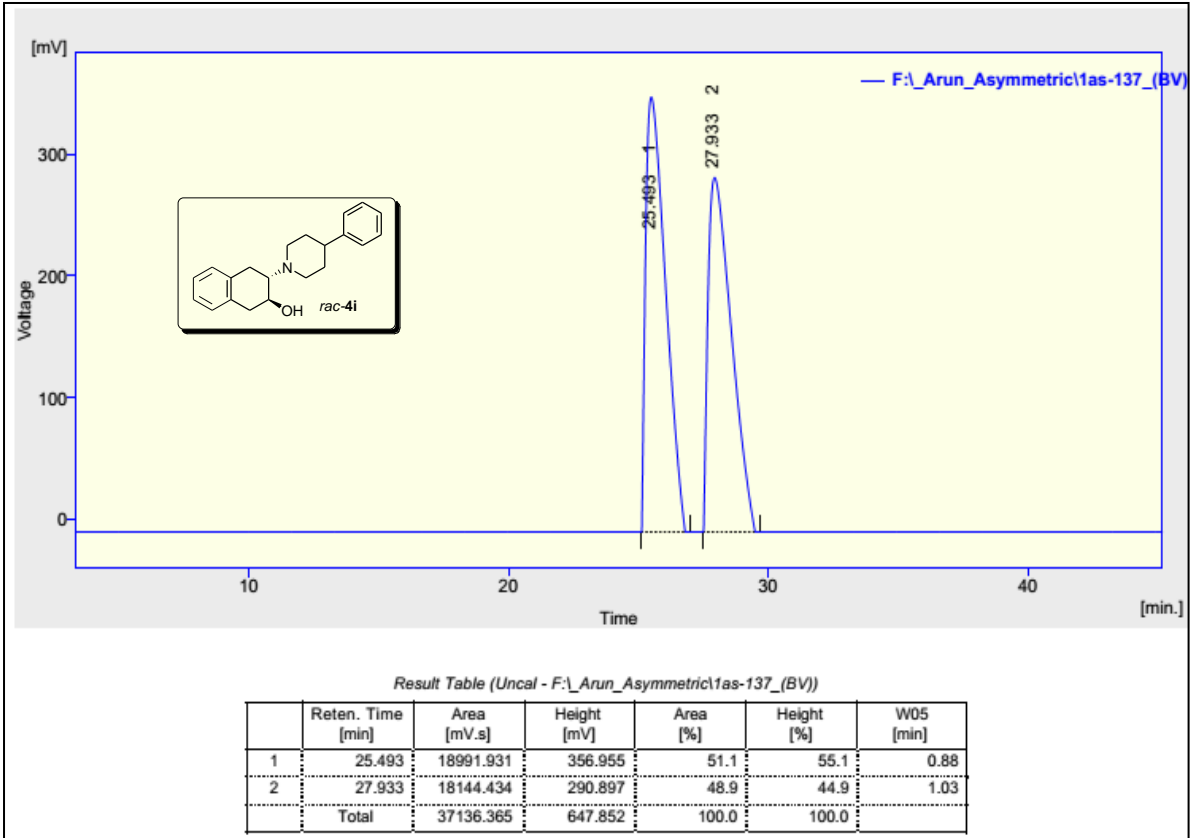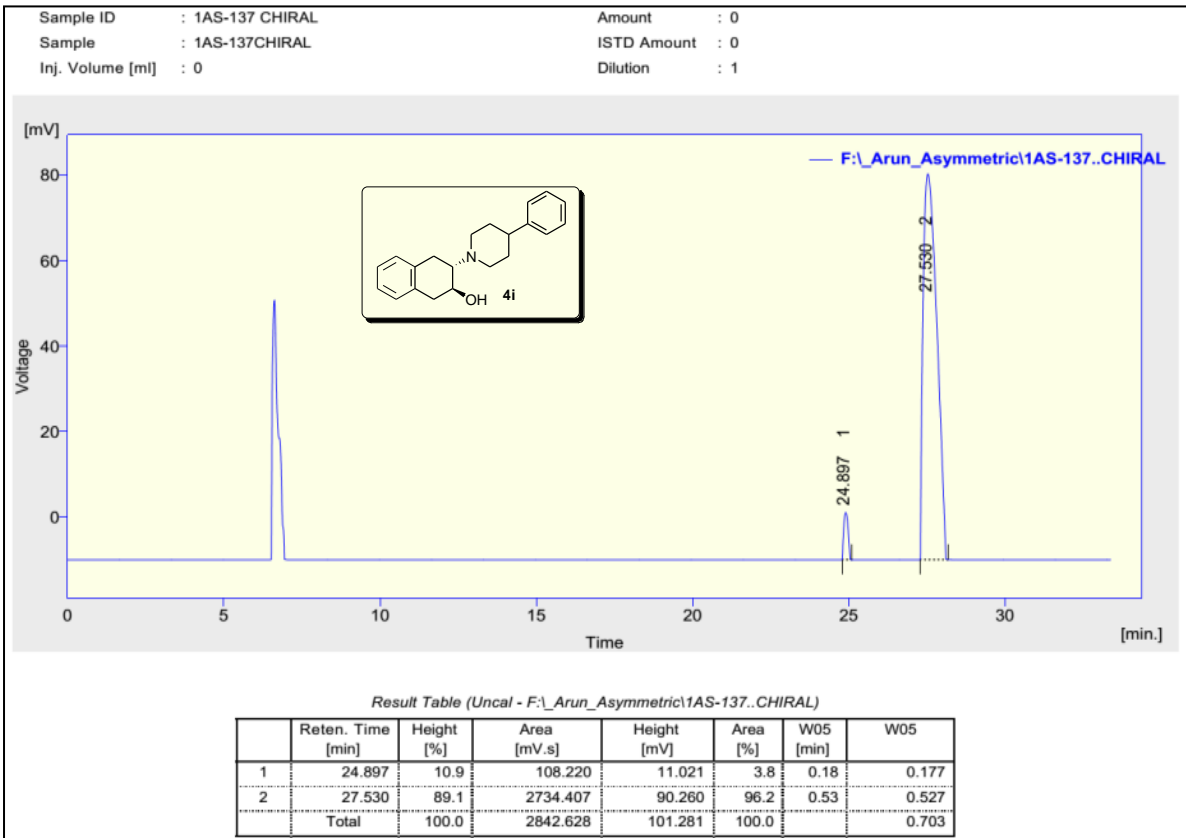

Sample ID : 7ja-11\_R Amount : 0  
 Sample : ISTD Amount : 0  
 Inj. Volume [ml] : 0 Dilution : 1

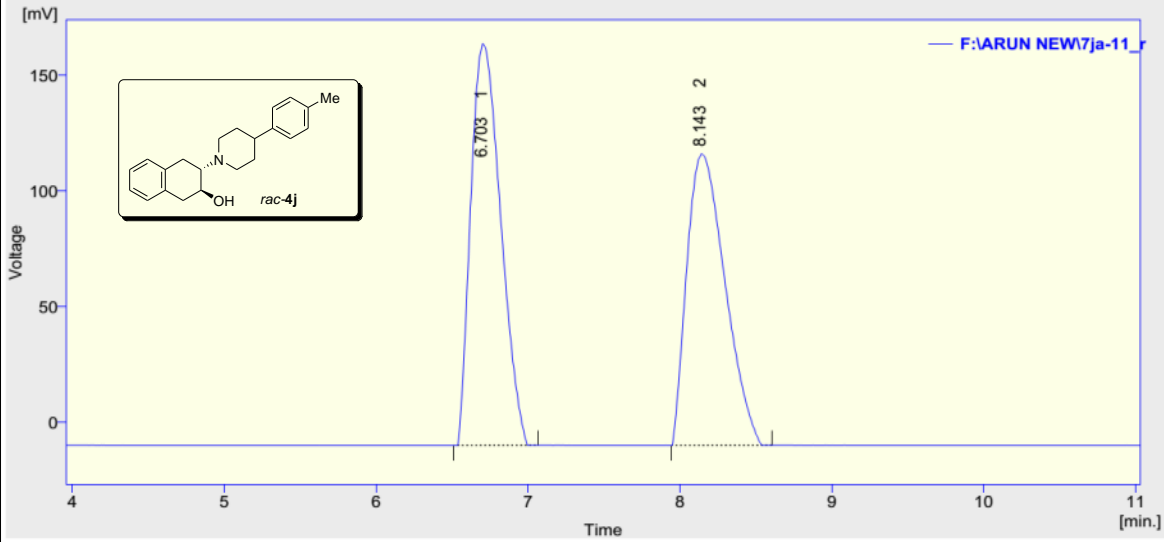

Result Table (Uncal - F:\ARUN NEW\7ja-11\_r)

|   | Reten. Time [min] | Height [%] | Area [mV.s] | Height [mV] | Area [%] | W05 [min] | W05   |
|---|-------------------|------------|-------------|-------------|----------|-----------|-------|
| 1 | 6.703             | 57.9       | 2368.719    | 173.407     | 51.9     | 0.22      | 0.223 |
| 2 | 8.143             | 42.1       | 2198.912    | 125.902     | 48.1     | 0.28      | 0.283 |
|   | Total             | 100.0      | 4567.630    | 299.309     | 100.0    |           | 0.507 |

Sample ID : 4-Me\_BV Amount : 0  
 Sample : ISTD Amount : 0  
 Inj. Volume [ml] : 0 Dilution : 1

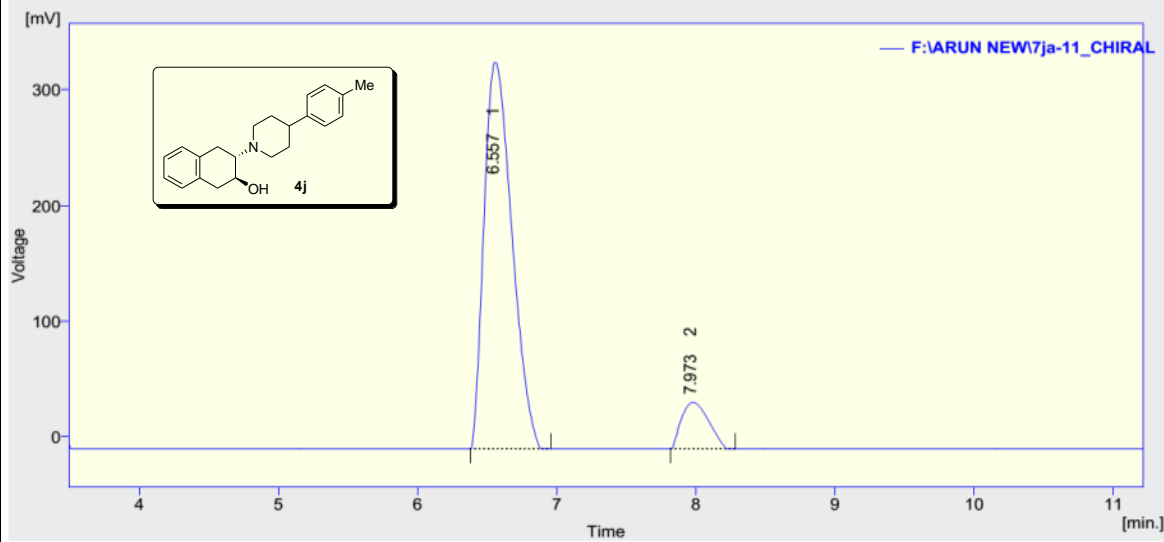

Result Table (Uncal - F:\ARUN NEW\7ja-11\_CHIRAL)

|   | Reten. Time [min] | Height [%] | Area [mV.s] | Height [mV] | Area [%] | W05 [min] | W05   |
|---|-------------------|------------|-------------|-------------|----------|-----------|-------|
| 1 | 6.557             | 89.3       | 4636.688    | 333.572     | 89.6     | 0.23      | 0.227 |
| 2 | 7.973             | 10.7       | 540.748     | 39.983      | 10.4     | 0.23      | 0.233 |
|   | Total             | 100.0      | 5177.436    | 373.555     | 100.0    |           | 0.460 |

Sample Info:

Sample ID : 1AS-139 RECIMIC  
 Sample : 1AS-139 RECIMIC  
 Inj. Volume [ml] : 0

Amount : 0  
 ISTD Amount : 0  
 Dilution : 1

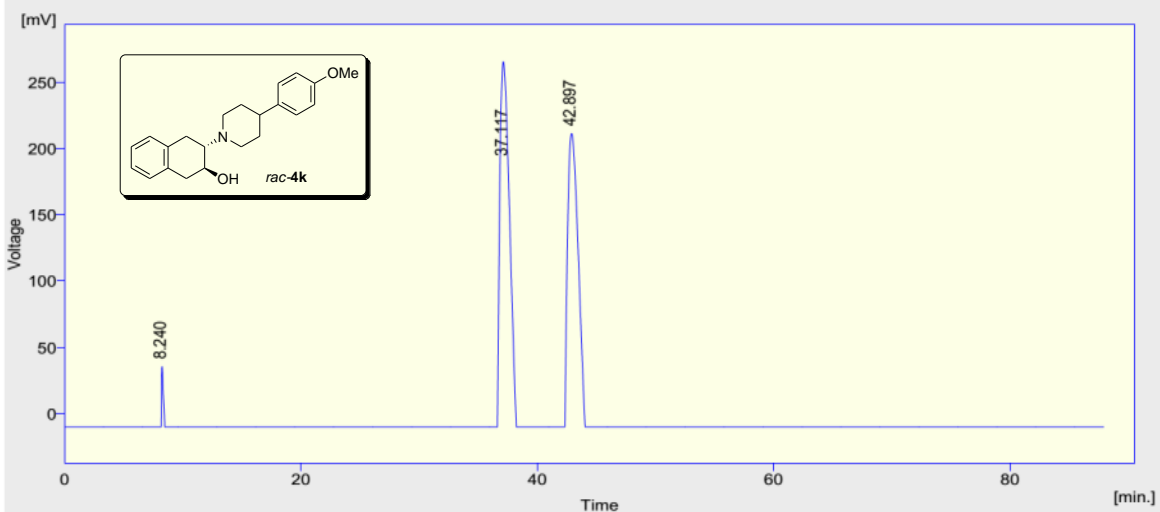

Result Table (Uncal - F:\\_Arun\_Asymmetric\1AS-139 RECIMIC)

|       | Reten. Time [min] | Area [mV.s] | Height [mV] | Area [%] | Height [%] | W05 [min] |
|-------|-------------------|-------------|-------------|----------|------------|-----------|
| 1     | 8.240             | 477.251     | 45.515      | 1.6      | 8.4        | 0.18      |
| 2     | 37.117            | 15409.146   | 275.643     | 52.2     | 50.8       | 0.95      |
| 3     | 42.897            | 13607.952   | 221.449     | 46.1     | 40.8       | 1.06      |
| Total |                   | 29494.359   | 542.607     | 100.0    | 100.0      |           |

Sample ID : 1AS-139 CHIRAL  
 Sample : 1AS-139 CHIRAL  
 Inj. Volume [ml] : 0

Amount : 0  
 ISTD Amount : 0  
 Dilution : 1

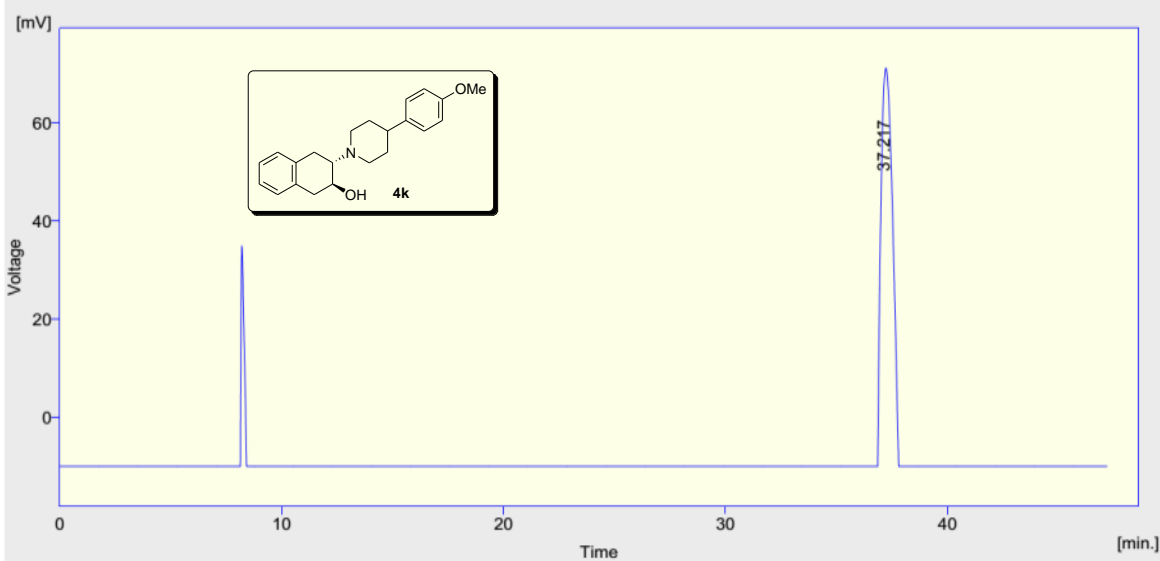

Result Table (Uncal - F:\\_Arun\_Asymmetric\1AS-139(2) CHIRAL)

|       | Reten. Time [min] | Area [mV.s] | Height [mV] | Area [%] | Height [%] | W05 [min] |
|-------|-------------------|-------------|-------------|----------|------------|-----------|
| 1     | 37.217            | 2928.880    | 81.026      | 100.0    | 100.0      | 0.64      |
| Total |                   | 2928.880    | 81.026      | 100.0    | 100.0      |           |

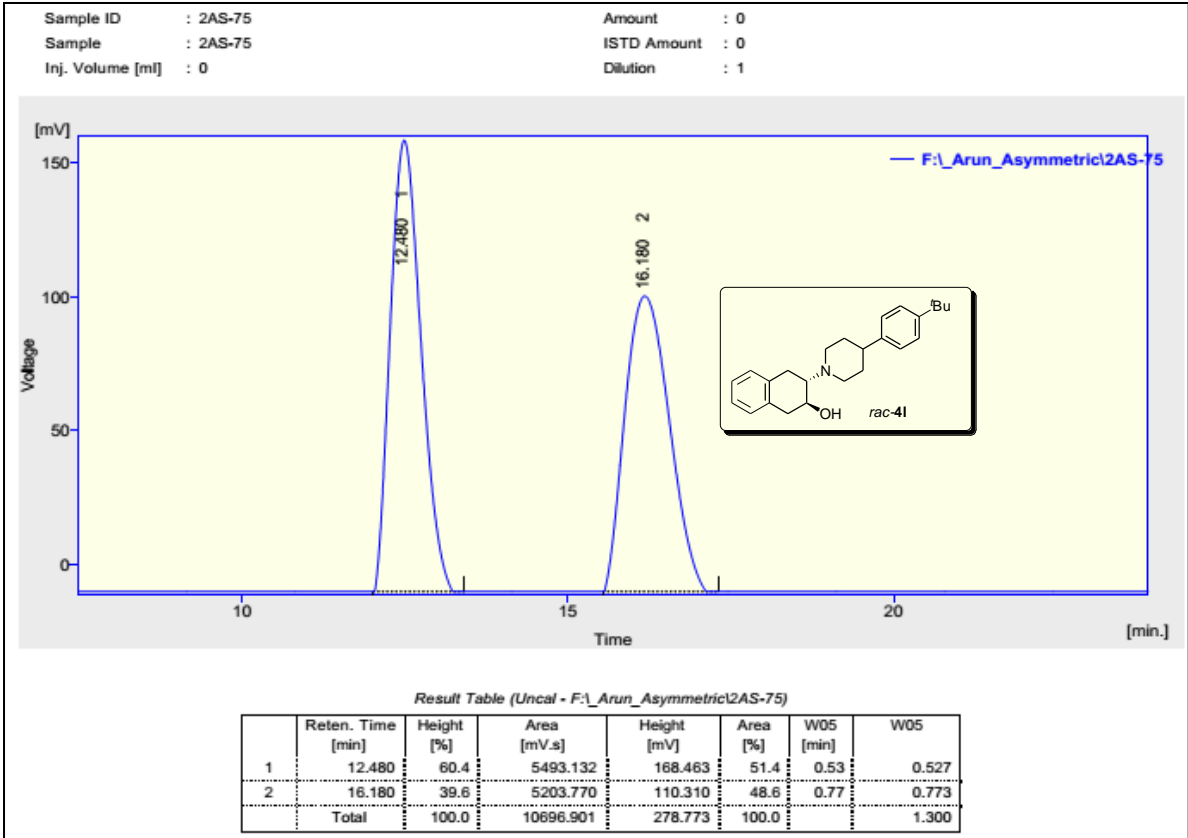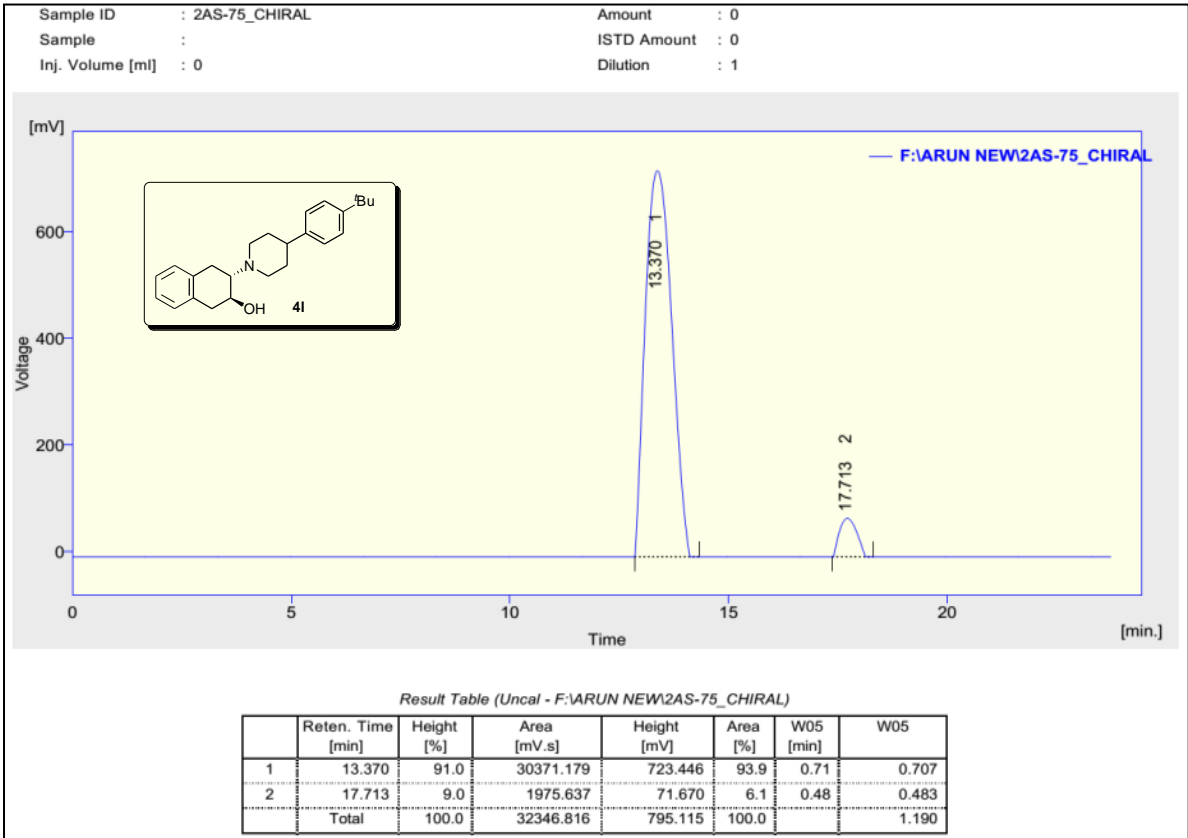



Sample Info:

Sample ID : Amount : 0  
 Sample : ISTD Amount : 0  
 Inj. Volume [ml] : 0 Dilution : 1

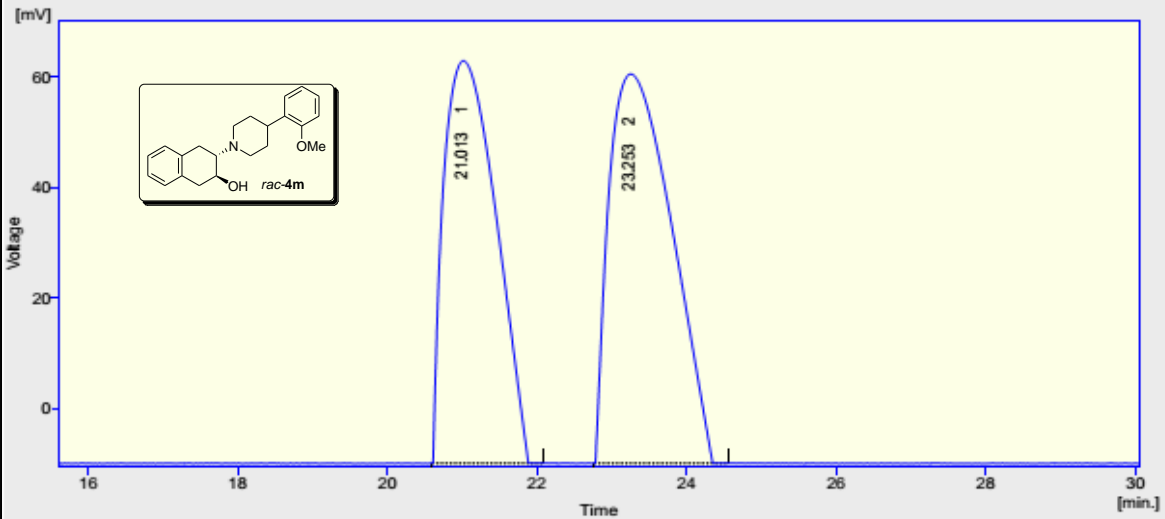

Result Table (Uncal - F:\ARUN NEW\2-Ome-(BV)\_RECIMIC\_1AS-254.)

|       | Reten. Time [min] | Height [%] | Area [mV.s] | Height [mV] | Area [%] | W05 [min] | W05   |
|-------|-------------------|------------|-------------|-------------|----------|-----------|-------|
| 1     | 21.013            | 50.8       | 3524.996    | 72.916      | 46.3     | 0.84      | 0.843 |
| 2     | 23.253            | 49.2       | 4093.675    | 70.548      | 53.7     | 1.00      | 1.003 |
| Total |                   | 100.0      | 7618.671    | 143.464     | 100.0    |           | 1.847 |

Sample Info:

Sample ID : 2-Ome-(BV)\_CHIRAL Amount : 0  
 Sample : ISTD Amount : 0  
 Inj. Volume [ml] : 0 Dilution : 1

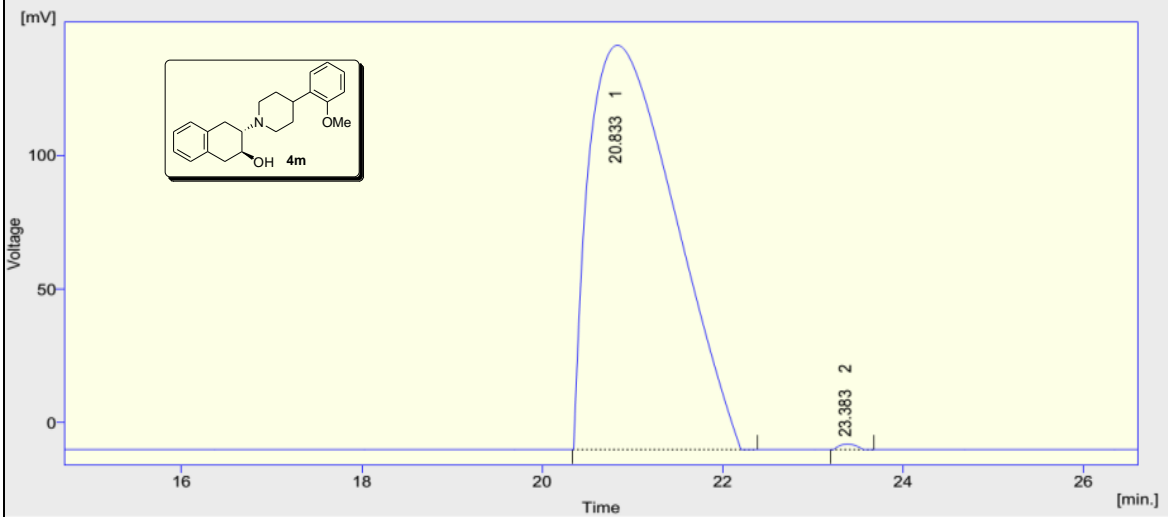

Result Table (Uncal - F:\ARUN NEW\2-Ome-(BV)\_CHIRAL.)

|       | Reten. Time [min] | Height [%] | Area [mV.s] | Height [mV] | Area [%] | W05 [min] | W05   |
|-------|-------------------|------------|-------------|-------------|----------|-----------|-------|
| 1     | 20.833            | 98.6       | 9914.190    | 151.046     | 99.7     | 1.12      | 1.120 |
| 2     | 23.383            | 1.4        | 27.854      | 2.085       | 0.3      | 0.24      | 0.240 |
| Total |                   | 100.0      | 9942.044    | 153.130     | 100.0    |           | 1.360 |

Sample ID : 1AS-183 Amount : 0  
 Sample : 1AS-183 ISTD Amount : 0  
 Inj. Volume [ml] : 0 Dilution : 1

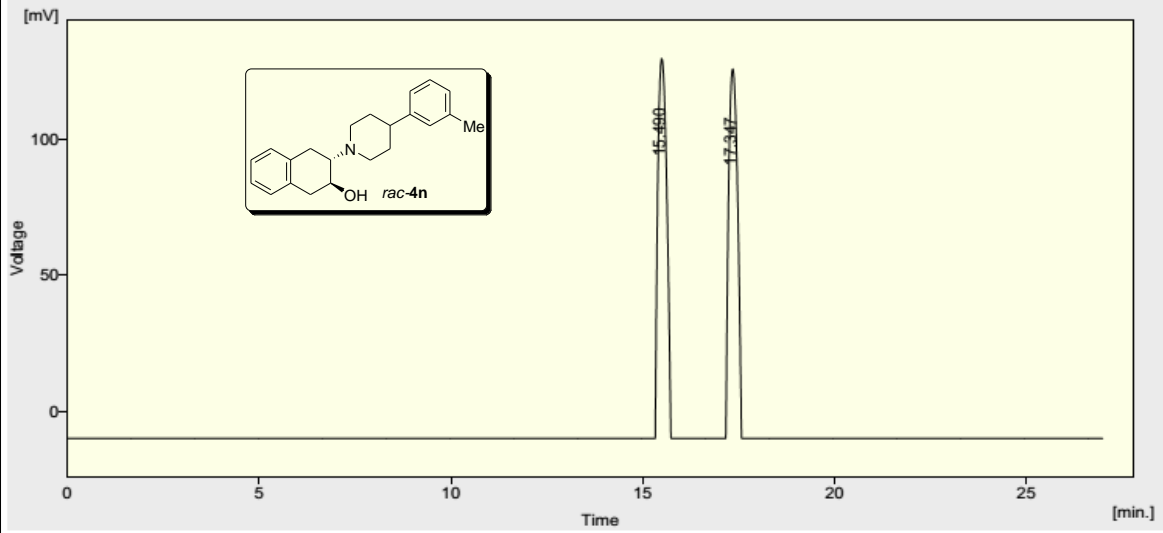

Result Table (Uncal - F:\\_Arun\_Asymmetric\1AS-183)

|   | Reten. Time [min] | Area [mV.s] | Height [mV] | Area [%] | Height [%] | W05 [min] |
|---|-------------------|-------------|-------------|----------|------------|-----------|
| 1 | 15.490            | 2263.779    | 139.579     | 50.7     | 50.7       | 0.29      |
| 2 | 17.347            | 2203.978    | 135.743     | 49.3     | 49.3       | 0.29      |
|   | Total             | 4467.757    | 275.322     | 100.0    | 100.0      |           |

Sample ID : 1AS-200\_1 Amount : 0  
 Sample : 1AS-200\_1 ISTD Amount : 0  
 Inj. Volume [ml] : 0 Dilution : 1

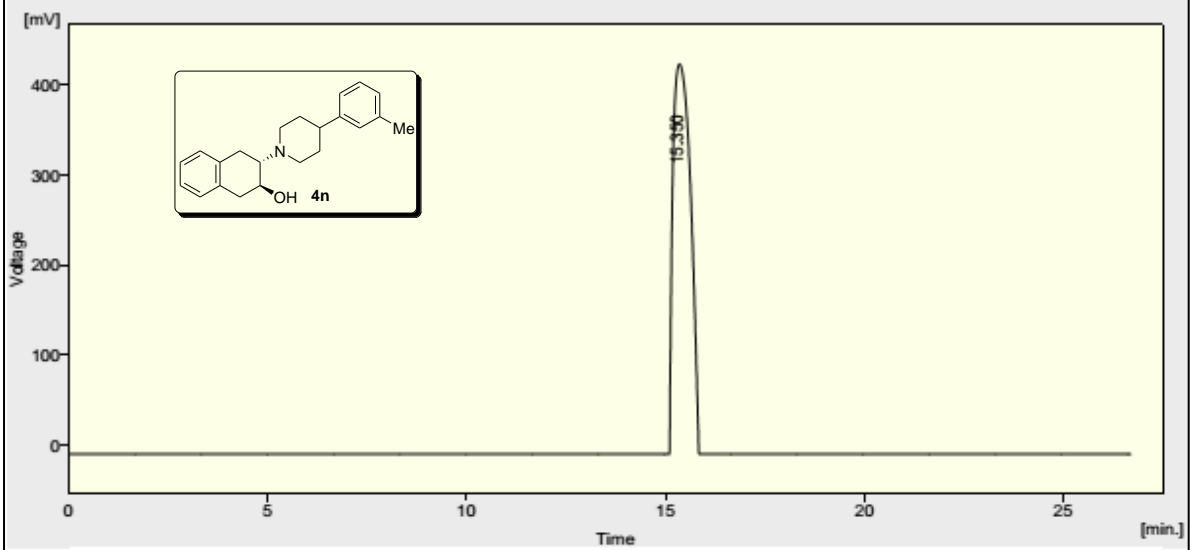

Result Table (Uncal - F:\\_Arun\_Asymmetric\1AS-200\_1)

|   | Reten. Time [min] | Area [mV.s] | Height [mV] | Area [%] | Height [%] | W05 [min] |
|---|-------------------|-------------|-------------|----------|------------|-----------|
| 1 | 15.350            | 13389.685   | 433.664     | 100.0    | 100.0      | 0.55      |
|   | Total             | 13389.685   | 433.664     | 100.0    | 100.0      |           |

Sample Info:

Sample ID : CF3-BV\_RACIMIC  
 Sample :  
 Inj. Volume [ml] : 0

Amount : 0  
 ISTD Amount : 0  
 Dilution : 1

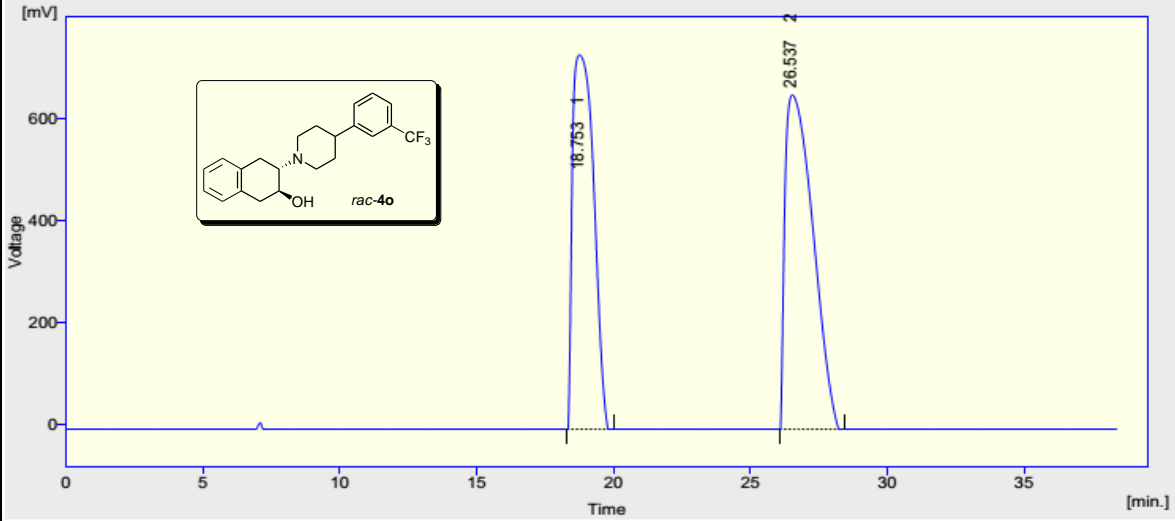

Result Table (Uncal - F:\\_Arun\_Asymmetric\CF3-BV\_RACIMIC)

|       | Reten. Time [min] | Height [%] | Area [mV.s] | Height [mV] | Area [%] | W05 [min] | W05   |
|-------|-------------------|------------|-------------|-------------|----------|-----------|-------|
| 1     | 18.753            | 52.8       | 39631.737   | 735.970     | 46.0     | 0.91      | 0.913 |
| 2     | 26.537            | 47.2       | 46512.879   | 657.191     | 54.0     | 1.19      | 1.190 |
| Total |                   | 100.0      | 86144.615   | 1393.161    | 100.0    |           | 2.103 |

Sample Info:

Sample ID : CF3-BV  
 Sample :  
 Inj. Volume [ml] : 0

Amount : 0  
 ISTD Amount : 0  
 Dilution : 1

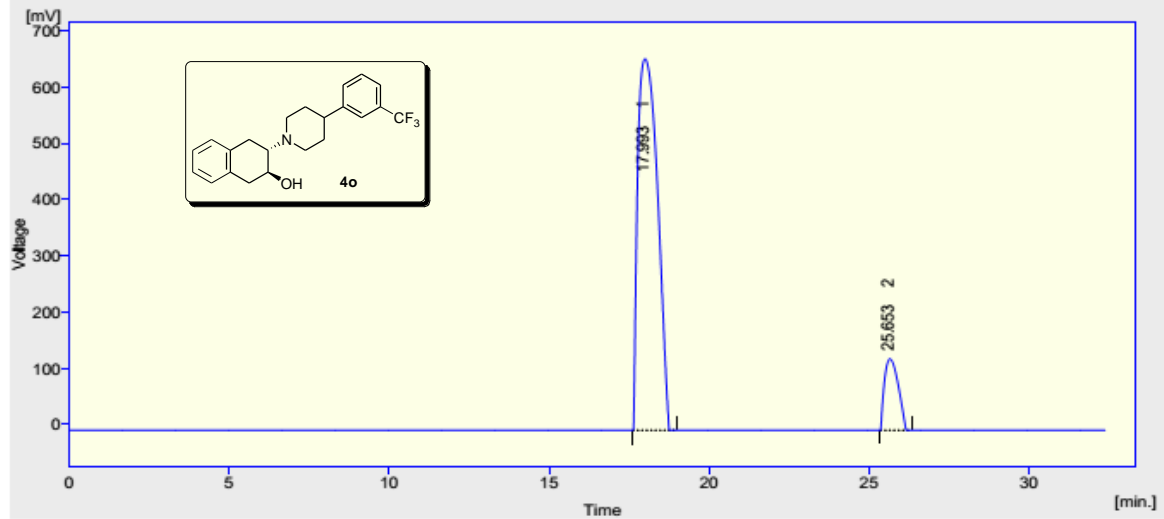

Result Table (Uncal - F:\\_Arun\_Asymmetric\CF3-BV)

|       | Reten. Time [min] | Height [%] | Area [mV.s] | Height [mV] | Area [%] | W05 [min] | W05   |
|-------|-------------------|------------|-------------|-------------|----------|-----------|-------|
| 1     | 17.993            | 83.9       | 28288.746   | 660.102     | 88.1     | 0.74      | 0.743 |
| 2     | 25.653            | 16.1       | 3816.379    | 126.780     | 11.9     | 0.53      | 0.527 |
| Total |                   | 100.0      | 32105.125   | 786.882     | 100.0    |           | 1.270 |

Sample ID : 7JA-114 RE Amount : 0  
 Sample : 7JA-114 RE ISTD Amount : 0  
 Inj. Volume [ml] : 0 Dilution : 1

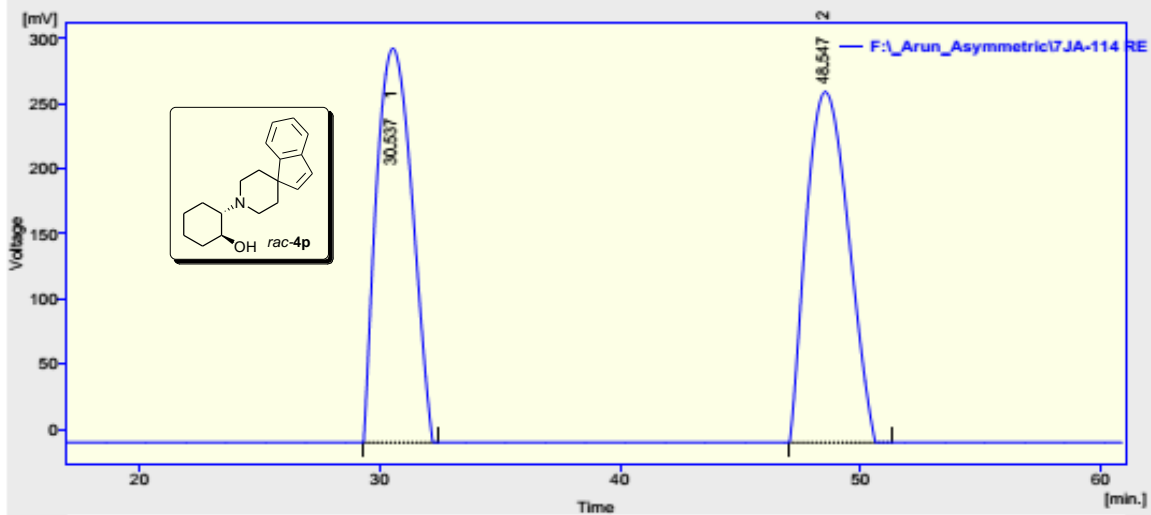

Result Table (Uncal - F:\\_Arun\_Asymmetric\7JA-114 RE)

|   | Reten. Time [min] | Height [%] | Area [mV.s] | Height [mV] | Area [%] | W05 [min] | W05   |
|---|-------------------|------------|-------------|-------------|----------|-----------|-------|
| 1 | 30.537            | 52.9       | 31010.675   | 302.561     | 48.7     | 1.76      | 1.757 |
| 2 | 48.547            | 47.1       | 32625.390   | 269.219     | 51.3     | 2.05      | 2.047 |
|   | Total             | 100.0      | 63636.065   | 571.780     | 100.0    |           | 3.803 |

Sample ID : 7JA-114 CHIRAL Amount : 0  
 Sample : 7JA-114 CHIRAL ISTD Amount : 0  
 Inj. Volume [ml] : 0 Dilution : 1

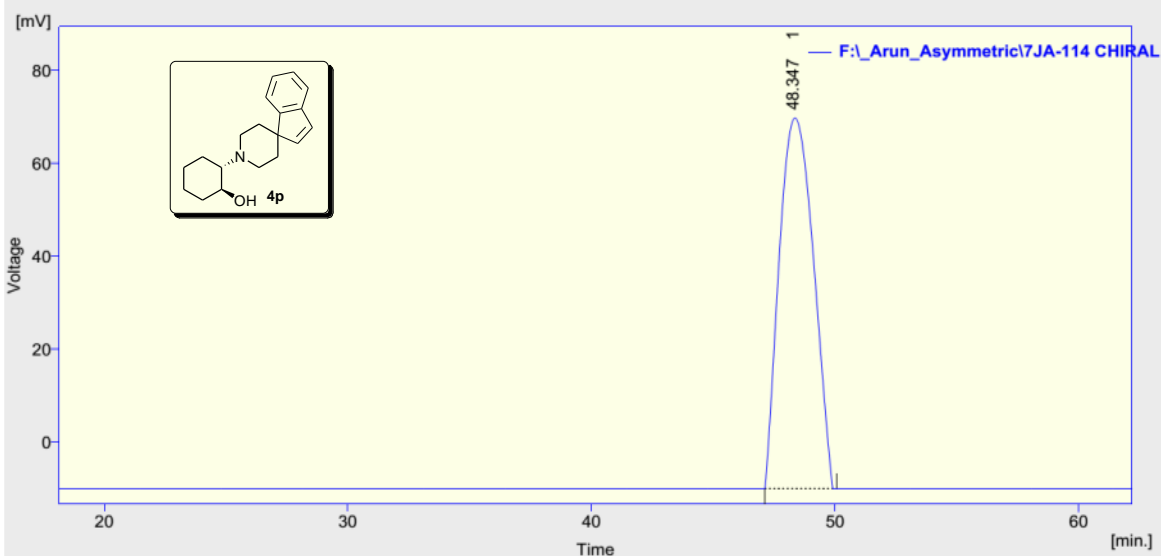

Result Table (Uncal - F:\\_Arun\_Asymmetric\7JA-114 CHIRAL)

|   | Reten. Time [min] | Height [%] | Area [mV.s] | Height [mV] | Area [%] | W05 [min] | W05   |
|---|-------------------|------------|-------------|-------------|----------|-----------|-------|
| 1 | 48.347            | 100.0      | 7765.946    | 79.698      | 100.0    | 1.66      | 1.660 |
|   | Total             | 100.0      | 7765.946    | 79.698      | 100.0    |           | 1.660 |

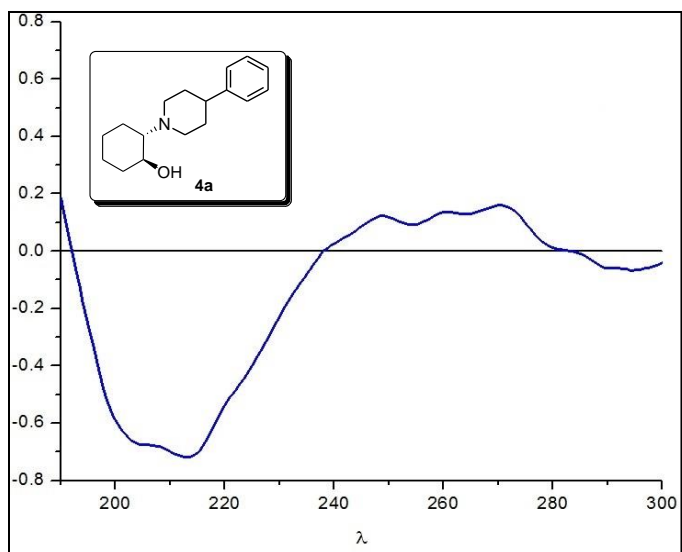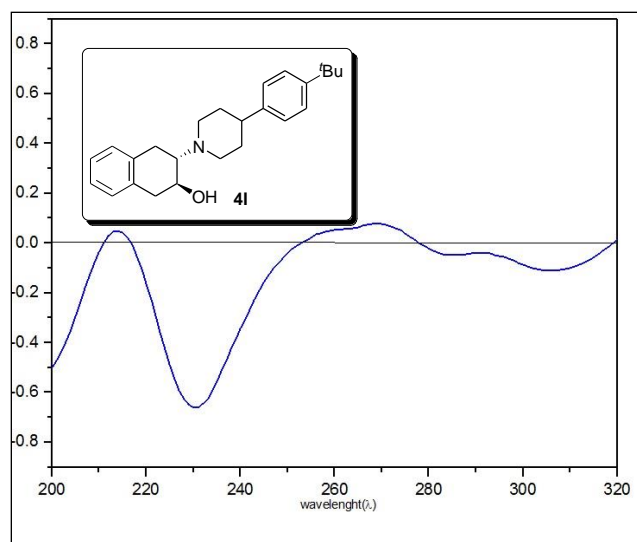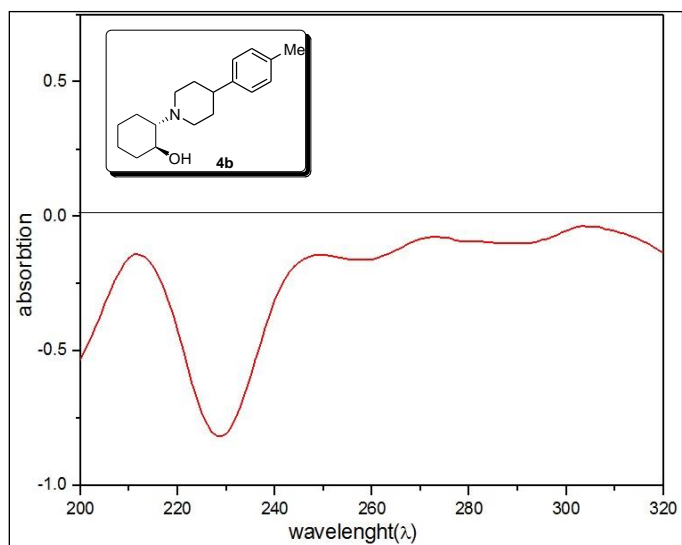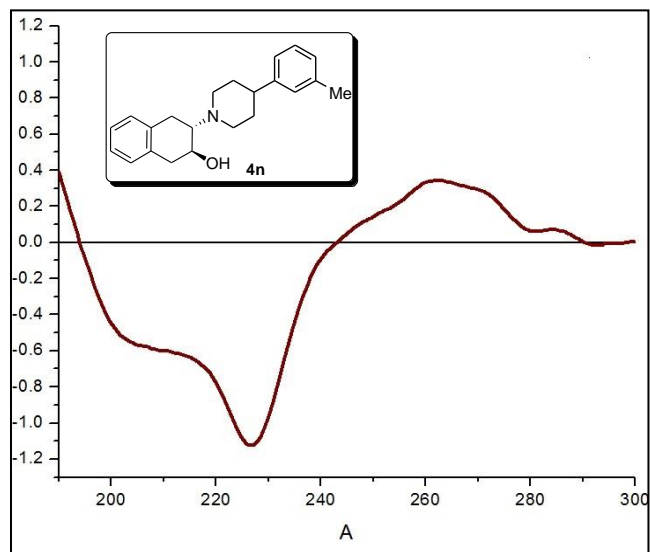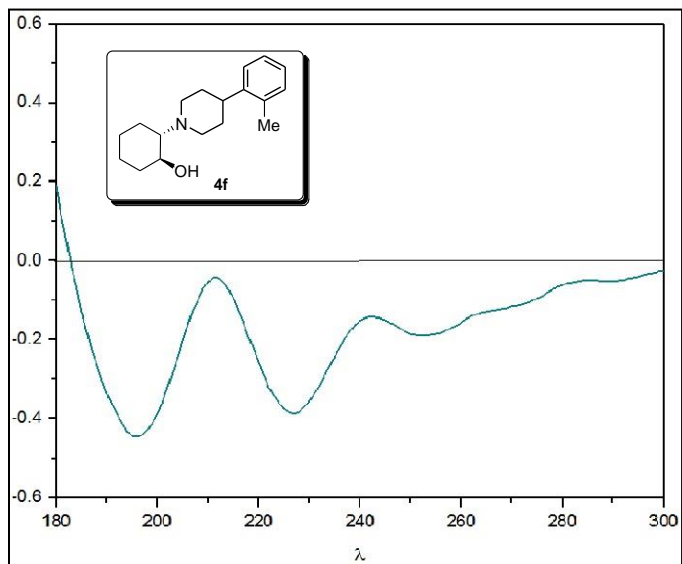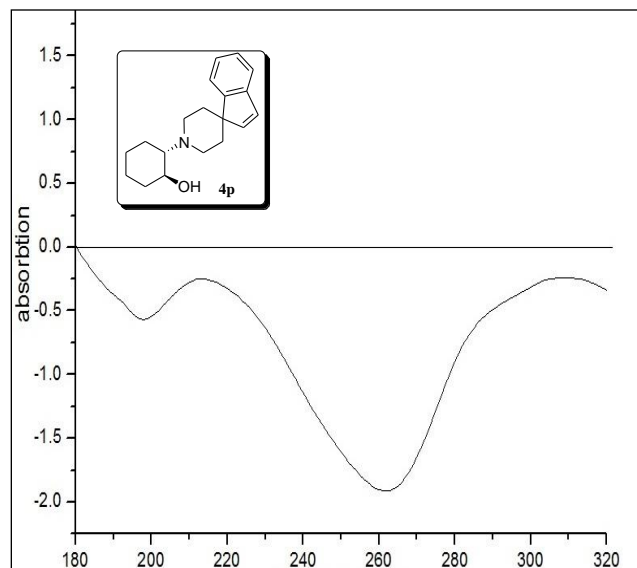

Supplement: c6ob02479c1.pdf [file c6ob02479c1.pdf]
